# Supplementary material for: Spike frequency adaptation supports network computations on temporally dispersed information
Source: eLife. 2021 Jul 26;10:e65459. doi: 10.7554/eLife.65459 (PMC8313230; doi:10.7554/eLife.65459)
Supplement: Figure 4—source data 1. [file elife-65459-fig4-data1.xlsx]

## Sheet: 3-way ANOVA per neuron
Source	SS	DF	MS	F	p-unc	np2	eta_sq	omega_sq	neuron_idx
Task	37974.2	1	37974.2	3166.56	0	0.071	0.000734559	0.000734327	0
Position	208432	4	52108.1	4345.15	0	0.295	0.00403185	0.00403092	0
Symbol	3.38285e+07	30	1.12762e+06	94028.9	0	0.985	0.654368	0.654361	0
Task * Position	3.89293e+06	4	973232	81155.2	0	0.887	0.0753035	0.0753026	0
Task * Symbol	94218.3	30	3140.61	261.887	0	0.159	0.00182253	0.00181557	0
Position * Symbol	6.08036e+06	120	50669.7	4225.21	0	0.924	0.117617	0.117589	0
Task * Position * Symbol	7.05591e+06	120	58799.2	4903.11	0	0.934	0.136487	0.136459	0
Residual	498158	41540	11.992						0
Source	SS	DF	MS	F	p-unc	np2	eta_sq	omega_sq	neuron_idx
Task	130329	1	130329	30986.4	0	0.427	0.0144041	0.0144037	1
Position	651781	4	162945	38741.1	0	0.789	0.0720358	0.0720339	1
Symbol	2.66303e+06	30	88767.7	21105	0	0.938	0.294322	0.294308	1
Task * Position	365481	4	91370.3	21723.8	0	0.677	0.0403935	0.0403916	1
Task * Symbol	375036	30	12501.2	2972.23	0	0.682	0.0414495	0.0414355	1
Position * Symbol	2.69781e+06	120	22481.7	5345.15	0	0.939	0.298165	0.298109	1
Task * Position * Symbol	1.98984e+06	120	16582	3942.45	0	0.919	0.21992	0.219864	1
Residual	174717	41540	4.206						1
Source	SS	DF	MS	F	p-unc	np2	eta_sq	omega_sq	neuron_idx
Task	53164	1	53164	15736.7	0	0.275	0.0102635	0.0102628	3
Position	311669	4	77917.2	23063.7	0	0.69	0.0601686	0.0601659	3
Symbol	1.39639e+06	30	46546.2	13777.8	0	0.909	0.269576	0.269557	3
Task * Position	73740.4	4	18435.1	5456.82	0	0.344	0.0142358	0.0142332	3
Task * Symbol	225483	30	7516.08	2224.78	0	0.616	0.04353	0.0435104	3
Position * Symbol	2.03466e+06	120	16955.5	5018.85	0	0.935	0.392796	0.392718	3
Task * Position * Symbol	944494	120	7870.78	2329.77	0	0.871	0.182337	0.182259	3
Residual	140337	41540	3.378						3
Source	SS	DF	MS	F	p-unc	np2	eta_sq	omega_sq	neuron_idx
Task	814.391	1	814.391	86.609	1.38495e-20	0.002	2.20143e-05	2.17601e-05	4
Position	1.26625e+06	4	316564	33665.9	0	0.764	0.0342289	0.0342279	4
Symbol	2.45521e+07	30	818403	87035.6	0	0.984	0.663683	0.663675	4
Task * Position	309735	4	77433.8	8234.94	0	0.442	0.00837265	0.00837163	4
Task * Symbol	65739.6	30	2191.32	233.043	0	0.144	0.00177705	0.00176942	4
Position * Symbol	6.78419e+06	120	56534.9	6012.38	0	0.946	0.183388	0.183357	4
Task * Position * Symbol	3.62426e+06	120	30202.2	3211.94	0	0.903	0.0979697	0.0979392	4
Residual	390604	41540	9.403						4
Source	SS	DF	MS	F	p-unc	np2	eta_sq	omega_sq	neuron_idx
Task	8117.13	1	8117.13	3256.48	0	0.073	0.00219776	0.00219709	7
Position	71403.3	4	17850.8	7161.5	0	0.408	0.0193329	0.0193302	7
Symbol	683248	30	22774.9	9136.98	0	0.868	0.184994	0.184973	7
Task * Position	109267	4	27316.7	10959.1	0	0.513	0.0295847	0.029582	7
Task * Symbol	54714.1	30	1823.8	731.684	0	0.346	0.0148142	0.0147939	7
Position * Symbol	1.04868e+06	120	8738.99	3505.96	0	0.91	0.283936	0.283855	7
Task * Position * Symbol	1.61439e+06	120	13453.2	5397.25	0	0.94	0.437106	0.437024	7
Residual	103543	41540	2.493						7
Source	SS	DF	MS	F	p-unc	np2	eta_sq	omega_sq	neuron_idx
Task	132.409	1	132.409	11.064	0.000881154	0	5.9731e-06	5.43321e-06	8
Position	4.2086e+06	4	1.05215e+06	87913.8	0	0.894	0.189854	0.189852	8
Symbol	5.36124e+06	30	178708	14932.2	0	0.915	0.241851	0.241834	8
Task * Position	1.70786e+06	4	426966	35675.7	0	0.775	0.0770435	0.0770413	8
Task * Symbol	159339	30	5311.3	443.792	0	0.243	0.00718794	0.00717174	8
Position * Symbol	5.41217e+06	120	45101.4	3768.51	0	0.916	0.244148	0.244083	8
Task * Position * Symbol	4.82104e+06	120	40175.4	3356.9	0	0.907	0.217482	0.217417	8
Residual	497150	41540	11.968						8
Source	SS	DF	MS	F	p-unc	np2	eta_sq	omega_sq	neuron_idx
Task	721031	1	721031	49825.7	0	0.545	0.0350731	0.0350724	9
Position	5.79022e+06	4	1.44756e+06	100031	0	0.906	0.281654	0.281651	9
Symbol	3.14138e+06	30	104713	7236.01	0	0.839	0.152806	0.152785	9
Task * Position	1.05629e+06	4	264072	18248.3	0	0.637	0.051381	0.0513781	9
Task * Symbol	416899	30	13896.6	960.305	0	0.41	0.0202792	0.0202581	9
Position * Symbol	4.6205e+06	120	38504.2	2660.77	0	0.885	0.224755	0.22467	9
Task * Position * Symbol	4.2105e+06	120	35087.5	2424.66	0	0.875	0.204811	0.204727	9
Residual	601128	41540	14.471						9
Source	SS	DF	MS	F	p-unc	np2	eta_sq	omega_sq	neuron_idx
Task	35031	1	35031	5754.35	0	0.122	0.00397759	0.00397689	10
Position	540469	4	135117	22195	0	0.681	0.0613674	0.0613646	10
Symbol	3.02629e+06	30	100876	16570.4	0	0.923	0.34362	0.343599	10
Task * Position	79777.7	4	19944.4	3276.17	0	0.24	0.00905835	0.00905558	10
Task * Symbol	171717	30	5723.9	940.234	0	0.404	0.0194976	0.0194768	10
Position * Symbol	3.11499e+06	120	25958.2	4264.02	0	0.925	0.353691	0.353608	10
Task * Position * Symbol	1.58594e+06	120	13216.1	2170.94	0	0.862	0.180075	0.179992	10
Residual	252885	41540	6.088						10
Source	SS	DF	MS	F	p-unc	np2	eta_sq	omega_sq	neuron_idx
Task	191190	1	191190	28786.8	0	0.409	0.0240077	0.0240069	11
Position	788640	4	197160	29685.7	0	0.741	0.0990294	0.099026	11
Symbol	1.67795e+06	30	55931.7	8421.43	0	0.859	0.2107	0.210675	11
Task * Position	556364	4	139091	20942.4	0	0.669	0.0698626	0.0698592	11
Task * Symbol	377049	30	12568.3	1892.36	0	0.577	0.047346	0.047321	11
Position * Symbol	2.06564e+06	120	17213.7	2591.8	0	0.882	0.259383	0.259282	11
Task * Position * Symbol	2.03096e+06	120	16924.7	2548.29	0	0.88	0.255028	0.254927	11
Residual	275892	41540	6.642						11
Source	SS	DF	MS	F	p-unc	np2	eta_sq	omega_sq	neuron_idx
Task	151018	1	151018	9203.56	0	0.181	0.00588172	0.00588108	13
Position	6.35683e+06	4	1.58921e+06	96852	0	0.903	0.247581	0.247578	13
Symbol	5.6778e+06	30	189260	11534.2	0	0.893	0.221135	0.221115	13
Task * Position	1.16847e+06	4	292119	17802.7	0	0.632	0.0455088	0.0455062	13
Task * Symbol	482074	30	16069.1	979.31	0	0.414	0.0187754	0.0187562	13
Position * Symbol	6.30241e+06	120	52520.1	3200.76	0	0.902	0.245461	0.245384	13
Task * Position * Symbol	4.85556e+06	120	40463	2465.96	0	0.877	0.18911	0.189034	13
Residual	681614	41540	16.409						13
Source	SS	DF	MS	F	p-unc	np2	eta_sq	omega_sq	neuron_idx
Task	4.16181e+06	1	4.16181e+06	348895	0	0.894	0.147431	0.147431	14
Position	7.76968e+06	4	1.94242e+06	162838	0	0.94	0.275239	0.275237	14
Symbol	805755	30	26858.5	2251.61	0	0.619	0.0285436	0.0285309	14
Task * Position	1.17324e+07	4	2.9331e+06	245889	0	0.959	0.415617	0.415615	14
Task * Symbol	171907	30	5730.23	480.38	0	0.258	0.00608976	0.00607708	14
Position * Symbol	1.24001e+06	120	10333.4	866.275	0	0.714	0.043927	0.0438763	14
Task * Position * Symbol	1.8518e+06	120	15431.6	1293.67	0	0.789	0.0655993	0.0655486	14
Residual	495512	41540	11.929						14
Source	SS	DF	MS	F	p-unc	np2	eta_sq	omega_sq	neuron_idx
Task	363.814	1	363.814	39.572	3.19261e-10	0.001	6.55004e-06	6.38452e-06	15
Position	570304	4	142576	15508.1	0	0.599	0.0102677	0.010267	15
Symbol	3.81547e+07	30	1.27182e+06	138338	0	0.99	0.686931	0.686926	15
Task * Position	4.76566e+06	4	1.19141e+06	129591	0	0.926	0.0858001	0.0857994	15
Task * Symbol	12753.8	30	425.127	46.242	2.14119e-268	0.032	0.000229618	0.000224652	15
Position * Symbol	2.33905e+06	120	19492	2120.17	0	0.86	0.0421118	0.0420919	15
Task * Position * Symbol	9.31898e+06	120	77658.2	8446.96	0	0.961	0.167777	0.167757	15
Residual	381903	41540	9.194						15
Source	SS	DF	MS	F	p-unc	np2	eta_sq	omega_sq	neuron_idx
Task	1106.85	1	1106.85	124.82	6.1295e-29	0.003	2.41643e-05	2.39707e-05	16
Position	864388	4	216097	24369.3	0	0.701	0.018871	0.0188702	16
Symbol	2.60338e+07	30	867795	97861.5	0	0.986	0.568361	0.568355	16
Task * Position	4.40315e+06	4	1.10079e+06	124136	0	0.923	0.096128	0.0961272	16
Task * Symbol	15907.6	30	530.253	59.797	0	0.041	0.000347289	0.000341481	16
Position * Symbol	5.19445e+06	120	43287.1	4881.49	0	0.934	0.113403	0.11338	16
Task * Position * Symbol	8.92389e+06	120	74365.7	8386.25	0	0.96	0.194823	0.1948	16
Residual	368359	41540	8.868						16
Source	SS	DF	MS	F	p-unc	np2	eta_sq	omega_sq	neuron_idx
Task	2620.88	1	2620.88	238.01	1.50473e-53	0.006	5.01702e-05	4.99594e-05	17
Position	597351	4	149338	13561.8	0	0.566	0.0114348	0.0114339	17
Symbol	4.21982e+07	30	1.40661e+06	127738	0	0.989	0.80778	0.807773	17
Task * Position	933687	4	233422	21197.7	0	0.671	0.0178731	0.0178723	17
Task * Symbol	33463.4	30	1115.45	101.297	0	0.068	0.000640574	0.00063425	17
Position * Symbol	3.90037e+06	120	32503.1	2951.7	0	0.895	0.0746629	0.0746376	17
Task * Position * Symbol	4.11662e+06	120	34305.1	3115.35	0	0.9	0.0788024	0.0787771	17
Residual	457424	41540	11.012						17
Source	SS	DF	MS	F	p-unc	np2	eta_sq	omega_sq	neuron_idx
Task	855.062	1	855.062	51.913	5.89984e-13	0.001	2.12302e-05	2.08212e-05	18
Position	5.42561e+06	4	1.3564e+06	82350.8	0	0.888	0.134712	0.13471	18
Symbol	1.79671e+07	30	598902	36360.9	0	0.963	0.446101	0.446089	18
Task * Position	326620	4	81654.9	4957.48	0	0.323	0.00810959	0.00810795	18
Task * Symbol	16787.4	30	559.58	33.974	1.51793e-192	0.024	0.000416811	0.000404543	18
Position * Symbol	8.45859e+06	120	70488.2	4279.53	0	0.925	0.210017	0.209968	18
Task * Position * Symbol	7.39603e+06	120	61633.5	3741.93	0	0.915	0.183635	0.183586	18
Residual	684207	41540	16.471						18
Source	SS	DF	MS	F	p-unc	np2	eta_sq	omega_sq	neuron_idx
Task	648725	1	648725	122295	0	0.746	0.0437089	0.0437086	19
Position	3.6985e+06	4	924624	174306	0	0.944	0.249192	0.249191	19
Symbol	1.06462e+06	30	35487.4	6689.94	0	0.829	0.0717307	0.0717199	19
Task * Position	3.00767e+06	4	751918	141748	0	0.932	0.202647	0.202645	19
Task * Symbol	346620	30	11554	2178.11	0	0.611	0.0233541	0.0233434	19
Position * Symbol	2.46455e+06	120	20537.9	3871.72	0	0.918	0.166053	0.16601	19
Task * Position * Symbol	3.3909e+06	120	28257.5	5326.98	0	0.939	0.228467	0.228425	19
Residual	220353	41540	5.305						19
Source	SS	DF	MS	F	p-unc	np2	eta_sq	omega_sq	neuron_idx
Task	42152.5	1	42152.5	5492.69	0	0.117	0.00266557	0.00266508	22
Position	836509	4	209127	27250.4	0	0.724	0.0528976	0.0528956	22
Symbol	4.80915e+06	30	160305	20888.6	0	0.938	0.304113	0.304098	22
Task * Position	1.12864e+06	4	282160	36766.9	0	0.78	0.0713708	0.0713688	22
Task * Symbol	139019	30	4633.98	603.831	0	0.304	0.00879105	0.00877649	22
Position * Symbol	2.75554e+06	120	22962.9	2992.18	0	0.896	0.17425	0.174192	22
Task * Position * Symbol	5.78392e+06	120	48199.4	6280.63	0	0.948	0.365753	0.365695	22
Residual	318790	41540	7.674						22
Source	SS	DF	MS	F	p-unc	np2	eta_sq	omega_sq	neuron_idx
Task	118518	1	118518	40159.2	0	0.492	0.0180418	0.0180414	23
Position	533030	4	133258	45153.8	0	0.813	0.0811428	0.0811409	23
Symbol	1.17478e+06	30	39159.2	13268.9	0	0.906	0.178835	0.178822	23
Task * Position	740670	4	185168	62743.2	0	0.858	0.112752	0.11275	23
Task * Symbol	217789	30	7259.64	2459.9	0	0.64	0.0331538	0.0331404	23
Position * Symbol	1.36444e+06	120	11370.3	3852.8	0	0.918	0.207708	0.207654	23
Task * Position * Symbol	2.29722e+06	120	19143.5	6486.71	0	0.949	0.349705	0.349651	23
Residual	122593	41540	2.951						23
Source	SS	DF	MS	F	p-unc	np2	eta_sq	omega_sq	neuron_idx
Task	12338.8	1	12338.8	4870.81	0	0.105	0.00712631	0.00712484	24
Position	79157.9	4	19789.5	7811.99	0	0.429	0.0457178	0.0457118	24
Symbol	364006	30	12133.5	4789.77	0	0.776	0.210232	0.210188	24
Task * Position	33265.5	4	8316.38	3282.93	0	0.24	0.0192125	0.0192067	24
Task * Symbol	77814.5	30	2593.82	1023.92	0	0.425	0.0449419	0.0448979	24
Position * Symbol	788671	120	6572.26	2594.43	0	0.882	0.455498	0.455322	24
Task * Position * Symbol	270964	120	2258.03	891.369	0	0.72	0.156496	0.15632	24
Residual	105230	41540	2.533						24
Source	SS	DF	MS	F	p-unc	np2	eta_sq	omega_sq	neuron_idx
Task	4678.71	1	4678.71	413.06	2.20421e-91	0.01	0.000304623	0.000303885	25
Position	3.11925e+06	4	779812	68845.7	0	0.869	0.203089	0.203086	25
Symbol	4.46909e+06	30	148970	13151.8	0	0.905	0.290975	0.290953	25
Task * Position	465097	4	116274	10265.3	0	0.497	0.0302817	0.0302787	25
Task * Symbol	301866	30	10062.2	888.342	0	0.391	0.019654	0.0196319	25
Position * Symbol	3.50265e+06	120	29188.7	2576.93	0	0.882	0.228052	0.227963	25
Task * Position * Symbol	3.02586e+06	120	25215.5	2226.15	0	0.865	0.197009	0.19692	25
Residual	470522	41540	11.327						25
Source	SS	DF	MS	F	p-unc	np2	eta_sq	omega_sq	neuron_idx
Task	39599.1	1	39599.1	3053.85	0	0.068	0.000792934	0.000792674	26
Position	2.43531e+06	4	608828	46952.3	0	0.819	0.0487648	0.0487637	26
Symbol	2.86155e+07	30	953851	73560.1	0	0.982	0.572998	0.57299	26
Task * Position	3.85207e+06	4	963017	74267	0	0.877	0.0771339	0.0771328	26
Task * Symbol	78420.4	30	2614.01	201.591	0	0.127	0.00157029	0.0015625	26
Position * Symbol	4.84395e+06	120	40366.2	3113.01	0	0.9	0.0969953	0.0969641	26
Task * Position * Symbol	9.5365e+06	120	79470.8	6128.72	0	0.947	0.190959	0.190928	26
Residual	538647	41540	12.967						26
Source	SS	DF	MS	F	p-unc	np2	eta_sq	omega_sq	neuron_idx
Task	571617	1	571617	113605	0	0.732	0.0399089	0.0399086	27
Position	3.13891e+06	4	784728	155959	0	0.938	0.219151	0.21915	27
Symbol	1.07803e+06	30	35934.4	7141.68	0	0.838	0.0752656	0.075255	27
Task * Position	4.01389e+06	4	1.00347e+06	199432	0	0.951	0.28024	0.280239	27
Task * Symbol	323731	30	10791	2144.63	0	0.608	0.0226021	0.0225916	27
Position * Symbol	2.14845e+06	120	17903.7	3558.22	0	0.911	0.149999	0.149957	27
Task * Position * Symbol	2.8394e+06	120	23661.7	4702.57	0	0.931	0.19824	0.198198	27
Residual	209014	41540	5.032						27
Source	SS	DF	MS	F	p-unc	np2	eta_sq	omega_sq	neuron_idx
Task	17621.2	1	17621.2	2092.4	0	0.048	0.00194574	0.00194481	29
Position	314344	4	78586	9331.57	0	0.473	0.0347099	0.0347061	29
Symbol	3.8857e+06	30	129523	15380	0	0.917	0.42906	0.429031	29
Task * Position	374001	4	93500.2	11102.5	0	0.517	0.0412972	0.0412934	29
Task * Symbol	137694	30	4589.8	545.008	0	0.282	0.0152042	0.0151763	29
Position * Symbol	1.68246e+06	120	14020.5	1664.84	0	0.828	0.185777	0.185665	29
Task * Position * Symbol	2.29467e+06	120	19122.3	2270.64	0	0.868	0.253378	0.253266	29
Residual	349830	41540	8.422						29
Source	SS	DF	MS	F	p-unc	np2	eta_sq	omega_sq	neuron_idx
Task	38216.5	1	38216.5	9452.28	0	0.185	0.0202221	0.02022	30
Position	167324	4	41831	10346.3	0	0.499	0.0885389	0.0885302	30
Symbol	205272	30	6842.39	1692.36	0	0.55	0.108619	0.108554	30
Task * Position	139054	4	34763.6	8598.26	0	0.453	0.0735803	0.0735715	30
Task * Symbol	135566	30	4518.87	1117.67	0	0.447	0.0717344	0.07167	30
Position * Symbol	555461	120	4628.84	1144.87	0	0.768	0.29392	0.293663	30
Task * Position * Symbol	480991	120	4008.26	991.383	0	0.741	0.254515	0.254258	30
Residual	167950	41540	4.043						30
Source	SS	DF	MS	F	p-unc	np2	eta_sq	omega_sq	neuron_idx
Task	602066	1	602066	46183.8	0	0.526	0.0277643	0.0277637	31
Position	1.06587e+06	4	266467	20440.4	0	0.663	0.0491526	0.0491501	31
Symbol	6.96338e+06	30	232113	17805.1	0	0.928	0.321117	0.321098	31
Task * Position	2.86692e+06	4	716729	54979.4	0	0.841	0.132208	0.132205	31
Task * Symbol	693326	30	23110.9	1772.81	0	0.561	0.0319728	0.0319547	31
Position * Symbol	3.28949e+06	120	27412.4	2102.77	0	0.859	0.151695	0.151623	31
Task * Position * Symbol	5.66232e+06	120	47186	3619.58	0	0.913	0.261118	0.261046	31
Residual	541529	41540	13.036						31
Source	SS	DF	MS	F	p-unc	np2	eta_sq	omega_sq	neuron_idx
Task	1676	1	1676	720.353	2.48023e-157	0.017	0.000787673	0.000786578	32
Position	120346	4	30086.6	12931.4	0	0.555	0.0565594	0.056555	32
Symbol	314624	30	10487.5	4507.56	0	0.765	0.147864	0.147831	32
Task * Position	11311.2	4	2827.8	1215.4	0	0.105	0.00531594	0.00531156	32
Task * Symbol	118251	30	3941.69	1694.16	0	0.55	0.0555745	0.0555417	32
Position * Symbol	759663	120	6330.53	2720.89	0	0.887	0.35702	0.356889	32
Task * Position * Symbol	705268	120	5877.23	2526.06	0	0.879	0.331456	0.331324	32
Residual	96648.6	41540	2.327						32
Source	SS	DF	MS	F	p-unc	np2	eta_sq	omega_sq	neuron_idx
Task	4448.89	1	4448.89	1521.01	0	0.035	0.000768192	0.000767687	33
Position	102237	4	25559.4	8738.4	0	0.457	0.0176534	0.0176514	33
Symbol	2.07015e+06	30	69005	23591.8	0	0.945	0.357454	0.357439	33
Task * Position	197119	4	49279.8	16848.1	0	0.619	0.0340367	0.0340347	33
Task * Symbol	34187.9	30	1139.6	389.612	0	0.22	0.00590325	0.00588809	33
Position * Symbol	1.08462e+06	120	9038.47	3090.13	0	0.899	0.187281	0.187221	33
Task * Position * Symbol	2.17711e+06	120	18142.6	6202.7	0	0.947	0.375923	0.375862	33
Residual	121502	41540	2.925						33
Source	SS	DF	MS	F	p-unc	np2	eta_sq	omega_sq	neuron_idx
Task	66564.6	1	66564.6	4836.28	0	0.104	0.0013074	0.00130713	34
Position	629454	4	157363	11433.3	0	0.524	0.0123632	0.0123621	34
Symbol	1.01027e+07	30	336755	24467.1	0	0.946	0.198428	0.198419	34
Task * Position	2.57202e+07	4	6.43005e+06	467178	0	0.978	0.505173	0.505172	34
Task * Symbol	81632.1	30	2721.07	197.701	0	0.125	0.00160335	0.00159523	34
Position * Symbol	4.20006e+06	120	35000.5	2542.97	0	0.88	0.0824937	0.0824613	34
Task * Position * Symbol	9.54131e+06	120	79510.9	5776.9	0	0.943	0.187402	0.187369	34
Residual	571740	41540	13.764						34
Source	SS	DF	MS	F	p-unc	np2	eta_sq	omega_sq	neuron_idx
Task	46872.3	1	46872.3	9278.26	0	0.183	0.0088371	0.00883614	36
Position	628968	4	157242	31125.7	0	0.75	0.118583	0.118579	36
Symbol	871562	30	29052.1	5750.79	0	0.806	0.164321	0.164292	36
Task * Position	168127	4	42031.8	8320.1	0	0.445	0.031698	0.0316941	36
Task * Symbol	177669	30	5922.29	1172.3	0	0.458	0.0334969	0.0334683	36
Position * Symbol	2.47563e+06	120	20630.2	4083.71	0	0.922	0.466744	0.46663	36
Task * Position * Symbol	725354	120	6044.62	1196.52	0	0.776	0.136755	0.136641	36
Residual	209853	41540	5.052						36
Source	SS	DF	MS	F	p-unc	np2	eta_sq	omega_sq	neuron_idx
Task	22946.7	1	22946.7	1876.09	0	0.043	0.00055802	0.000557722	37
Position	618622	4	154655	12644.4	0	0.549	0.0150437	0.0150425	37
Symbol	1.52824e+07	30	509414	41648.9	0	0.968	0.371639	0.37163	37
Task * Position	9.16148e+06	4	2.29037e+06	187257	0	0.947	0.22279	0.222789	37
Task * Symbol	26555.2	30	885.175	72.371	0	0.05	0.000645773	0.00063685	37
Position * Symbol	4.27966e+06	120	35663.9	2915.82	0	0.894	0.104073	0.104038	37
Task * Position * Symbol	1.12219e+07	120	93515.4	7645.68	0	0.957	0.272894	0.272859	37
Residual	508082	41540	12.231						37
Source	SS	DF	MS	F	p-unc	np2	eta_sq	omega_sq	neuron_idx
Task	2394.75	1	2394.75	803.945	3.51867e-175	0.019	0.000539529	0.000538858	38
Position	233985	4	58496.4	19637.9	0	0.654	0.0527162	0.0527135	38
Symbol	681294	30	22709.8	7623.94	0	0.846	0.153493	0.153473	38
Task * Position	392855	4	98213.7	32971.5	0	0.76	0.0885091	0.0885063	38
Task * Symbol	86092.9	30	2869.76	963.414	0	0.41	0.0193965	0.0193763	38
Position * Symbol	1.1676e+06	120	9729.96	3266.46	0	0.904	0.263056	0.262975	38
Task * Position * Symbol	1.75063e+06	120	14588.6	4897.56	0	0.934	0.394412	0.394331	38
Residual	123737	41540	2.979						38
Source	SS	DF	MS	F	p-unc	np2	eta_sq	omega_sq	neuron_idx
Task	6431.47	1	6431.47	782.923	1.07481e-170	0.018	0.000384755	0.000384264	40
Position	2.86677e+06	4	716692	87245.2	0	0.894	0.171501	0.171499	40
Symbol	4.18868e+06	30	139623	16996.7	0	0.925	0.250583	0.250568	40
Task * Position	942530	4	235632	28684.3	0	0.734	0.0563858	0.0563838	40
Task * Symbol	158021	30	5267.37	641.214	0	0.317	0.00945344	0.00943869	40
Position * Symbol	5.25845e+06	120	43820.5	5334.4	0	0.939	0.314581	0.314522	40
Task * Position * Symbol	2.95361e+06	120	24613.4	2996.27	0	0.896	0.176696	0.176637	40
Residual	341238	41540	8.215						40
Source	SS	DF	MS	F	p-unc	np2	eta_sq	omega_sq	neuron_idx
Task	15843.8	1	15843.8	1155.29	8.57317e-250	0.027	0.000288571	0.000288321	43
Position	2.59719e+06	4	649298	47345.2	0	0.82	0.047304	0.047303	43
Symbol	1.0727e+07	30	357567	26072.9	0	0.95	0.195377	0.195369	43
Task * Position	2.65435e+07	4	6.63586e+06	483871	0	0.979	0.48345	0.483449	43
Task * Symbol	75130.4	30	2504.35	182.611	0	0.117	0.00136839	0.0013609	43
Position * Symbol	4.64163e+06	120	38680.3	2820.47	0	0.891	0.0845405	0.0845105	43
Task * Position * Symbol	9.73431e+06	120	81119.2	5915.02	0	0.945	0.177296	0.177266	43
Residual	569684	41540	13.714						43
Source	SS	DF	MS	F	p-unc	np2	eta_sq	omega_sq	neuron_idx
Task	736.287	1	736.287	433.343	9.39646e-96	0.01	0.00019966	0.000199199	45
Position	66551.5	4	16637.9	9792.25	0	0.485	0.0180469	0.018045	45
Symbol	1.30814e+06	30	43604.8	25663.7	0	0.949	0.354731	0.354717	45
Task * Position	86015.1	4	21503.8	12656.1	0	0.549	0.0233248	0.023323	45
Task * Symbol	26294.8	30	876.493	515.862	0	0.271	0.0071304	0.00711657	45
Position * Symbol	981600	120	8180	4814.35	0	0.933	0.266182	0.266126	45
Task * Position * Symbol	1.14778e+06	120	9564.85	5629.41	0	0.942	0.311246	0.31119	45
Residual	70580	41540	1.699						45
Source	SS	DF	MS	F	p-unc	np2	eta_sq	omega_sq	neuron_idx
Task	304.538	1	304.538	19.18	1.19234e-05	0	6.24841e-06	5.92263e-06	47
Position	9.59934e+06	4	2.39984e+06	151145	0	0.936	0.196956	0.196955	47
Symbol	1.53852e+07	30	512840	32299.3	0	0.959	0.315668	0.315659	47
Task * Position	5.71595e+06	4	1.42899e+06	89999.3	0	0.897	0.117278	0.117277	47
Task * Symbol	56320.4	30	1877.35	118.238	0	0.079	0.00115556	0.00114579	47
Position * Symbol	8.2762e+06	120	68968.3	4343.71	0	0.926	0.169808	0.169769	47
Task * Position * Symbol	9.04559e+06	120	75379.9	4747.52	0	0.932	0.185594	0.185555	47
Residual	659561	41540	15.878						47
Source	SS	DF	MS	F	p-unc	np2	eta_sq	omega_sq	neuron_idx
Task	837.995	1	837.995	358.504	1.29213e-79	0.009	0.000173162	0.000172679	48
Position	124352	4	31087.9	13299.8	0	0.562	0.0256958	0.0256939	48
Symbol	1.44564e+06	30	48187.8	20615.3	0	0.937	0.298723	0.298709	48
Task * Position	59042	4	14760.5	6314.7	0	0.378	0.0122003	0.0121984	48
Task * Symbol	7572.64	30	252.421	107.989	0	0.072	0.0015648	0.00155031	48
Position * Symbol	2.24499e+06	120	18708.2	8003.6	0	0.959	0.4639	0.463842	48
Task * Position * Symbol	859849	120	7165.41	3065.44	0	0.899	0.177678	0.17762	48
Residual	97098.9	41540	2.337						48
Source	SS	DF	MS	F	p-unc	np2	eta_sq	omega_sq	neuron_idx
Task	105997	1	105997	9806.95	0	0.191	0.00244025	0.00244	50
Position	987117	4	246779	22832.4	0	0.687	0.0227254	0.0227244	50
Symbol	2.80071e+07	30	933569	86375	0	0.984	0.644777	0.64477	50
Task * Position	2.57665e+06	4	644161	59598.7	0	0.852	0.0593194	0.0593184	50
Task * Symbol	256809	30	8560.29	792.01	0	0.364	0.00591224	0.00590477	50
Position * Symbol	4.38293e+06	120	36524.4	3379.29	0	0.907	0.100904	0.100874	50
Task * Position * Symbol	6.67126e+06	120	55593.9	5143.62	0	0.937	0.153586	0.153556	50
Residual	448977	41540	10.808						50
Source	SS	DF	MS	F	p-unc	np2	eta_sq	omega_sq	neuron_idx
Task	452268	1	452268	98536.7	0	0.703	0.0397134	0.039713	51
Position	2.37785e+06	4	594462	129517	0	0.926	0.208797	0.208796	51
Symbol	924299	30	30810	6712.64	0	0.829	0.0811622	0.08115	51
Task * Position	2.80627e+06	4	701567	152852	0	0.936	0.246417	0.246415	51
Task * Symbol	304423	30	10147.4	2210.84	0	0.615	0.0267312	0.0267191	51
Position * Symbol	1.88304e+06	120	15692	3418.86	0	0.908	0.165349	0.165301	51
Task * Position * Symbol	2.44949e+06	120	20412.4	4447.3	0	0.928	0.215088	0.21504	51
Residual	190662	41540	4.59						51
Source	SS	DF	MS	F	p-unc	np2	eta_sq	omega_sq	neuron_idx
Task	1.68644e+06	1	1.68644e+06	114327	0	0.733	0.0451941	0.0451937	52
Position	7.97182e+06	4	1.99295e+06	135106	0	0.929	0.213633	0.213632	52
Symbol	1.91128e+06	30	63709.4	4318.99	0	0.757	0.0512196	0.0512077	52
Task * Position	1.80485e+07	4	4.51214e+06	305887	0	0.967	0.483675	0.483673	52
Task * Symbol	144508	30	4816.95	326.551	0	0.191	0.00387262	0.00386076	52
Position * Symbol	2.6456e+06	120	22046.7	1494.59	0	0.812	0.0708983	0.0708508	52
Task * Position * Symbol	4.29449e+06	120	35787.4	2426.1	0	0.875	0.115086	0.115039	52
Residual	612756	41540	14.751						52
Source	SS	DF	MS	F	p-unc	np2	eta_sq	omega_sq	neuron_idx
Task	54194.6	1	54194.6	5125.93	0	0.11	0.00365094	0.00365023	53
Position	2.09381e+06	4	523451	49510	0	0.827	0.141054	0.141051	53
Symbol	5.07346e+06	30	169115	15995.6	0	0.92	0.341785	0.341764	53
Task * Position	78098.3	4	19524.6	1846.71	0	0.151	0.00526127	0.00525841	53
Task * Symbol	341697	30	11389.9	1077.3	0	0.438	0.0230192	0.0229978	53
Position * Symbol	4.02473e+06	120	33539.4	3172.28	0	0.902	0.271135	0.271049	53
Task * Position * Symbol	2.73883e+06	120	22823.6	2158.74	0	0.862	0.184508	0.184422	53
Residual	439187	41540	10.573						53
Source	SS	DF	MS	F	p-unc	np2	eta_sq	omega_sq	neuron_idx
Task	27372.8	1	27372.8	3925.82	0	0.086	0.00260735	0.00260668	54
Position	182781	4	45695.2	6553.64	0	0.387	0.0174105	0.0174078	54
Symbol	7.08658e+06	30	236219	33878.7	0	0.961	0.67502	0.675	54
Task * Position	43333.8	4	10833.5	1553.74	0	0.13	0.00412769	0.00412503	54
Task * Symbol	103520	30	3450.68	494.898	0	0.263	0.00986065	0.00984072	54
Position * Symbol	1.89969e+06	120	15830.8	2270.46	0	0.868	0.180952	0.180872	54
Task * Position * Symbol	865408	120	7211.73	1034.31	0	0.749	0.082433	0.0823532	54
Residual	289637	41540	6.972						54
Source	SS	DF	MS	F	p-unc	np2	eta_sq	omega_sq	neuron_idx
Task	4322.64	1	4322.64	441.103	2.00249e-97	0.011	0.000231515	0.00023099	55
Position	734331	4	183583	18733.7	0	0.643	0.0393298	0.0393276	55
Symbol	4.39411e+06	30	146470	14946.6	0	0.915	0.235343	0.235327	55
Task * Position	2.66354e+06	4	665884	67950.1	0	0.867	0.142655	0.142653	55
Task * Symbol	169332	30	5644.39	575.982	0	0.294	0.00906918	0.00905343	55
Position * Symbol	3.54566e+06	120	29547.1	3015.14	0	0.897	0.189901	0.189838	55
Task * Position * Symbol	6.75275e+06	120	56272.9	5742.37	0	0.943	0.361668	0.361605	55
Residual	407076	41540	9.8						55
Source	SS	DF	MS	F	p-unc	np2	eta_sq	omega_sq	neuron_idx
Task	63009	1	63009	13062.7	0	0.239	0.0147164	0.0147153	56
Position	380538	4	95134.6	19722.8	0	0.655	0.0888787	0.0888741	56
Symbol	709776	30	23659.2	4904.91	0	0.78	0.165776	0.165742	56
Task * Position	208744	4	52186	10818.9	0	0.51	0.0487544	0.0487498	56
Task * Symbol	157975	30	5265.82	1091.68	0	0.441	0.0368966	0.0368628	56
Position * Symbol	1.27759e+06	120	10646.6	2207.2	0	0.864	0.298395	0.298259	56
Task * Position * Symbol	1.28354e+06	120	10696.2	2217.48	0	0.865	0.299784	0.299649	56
Residual	200371	41540	4.824						56
Source	SS	DF	MS	F	p-unc	np2	eta_sq	omega_sq	neuron_idx
Task	675.011	1	675.011	50.331	1.31935e-12	0.001	3.602e-05	3.53043e-05	57
Position	1.64582e+06	4	411455	30679.6	0	0.747	0.0878244	0.0878215	57
Symbol	7.10304e+06	30	236768	17654.3	0	0.927	0.379033	0.379011	57
Task * Position	1.24308e+06	4	310770	23172.1	0	0.691	0.0663333	0.0663304	57
Task * Symbol	162623	30	5420.76	404.191	0	0.226	0.00867788	0.00865641	57
Position * Symbol	4.55105e+06	120	37925.4	2827.86	0	0.891	0.242854	0.242768	57
Task * Position * Symbol	3.4765e+06	120	28970.8	2160.17	0	0.862	0.185513	0.185427	57
Residual	557108	41540	13.411						57
Source	SS	DF	MS	F	p-unc	np2	eta_sq	omega_sq	neuron_idx
Task	994.703	1	994.703	122.15	2.34496e-28	0.003	6.99827e-05	6.94098e-05	58
Position	1.24491e+06	4	311227	38218.7	0	0.786	0.0875861	0.0875837	58
Symbol	4.6287e+06	30	154290	18946.8	0	0.932	0.325654	0.325637	58
Task * Position	510437	4	127609	15670.4	0	0.601	0.035912	0.0359097	58
Task * Symbol	100775	30	3359.17	412.507	0	0.23	0.00709008	0.00707289	58
Position * Symbol	3.25638e+06	120	27136.5	3332.36	0	0.906	0.229104	0.229035	58
Task * Position * Symbol	4.13308e+06	120	34442.3	4229.52	0	0.924	0.290784	0.290715	58
Residual	338274	41540	8.143						58
Source	SS	DF	MS	F	p-unc	np2	eta_sq	omega_sq	neuron_idx
Task	10346.8	1	10346.8	3567.66	0	0.079	0.00258558	0.00258485	59
Position	67550.5	4	16887.6	5822.98	0	0.359	0.0168803	0.0168774	59
Symbol	1.18042e+06	30	39347.4	13567.3	0	0.907	0.294977	0.294955	59
Task * Position	50509	4	12627.2	4353.97	0	0.295	0.0126217	0.0126188	59
Task * Symbol	126502	30	4216.73	1453.96	0	0.512	0.0316117	0.0315899	59
Position * Symbol	1.94756e+06	120	16229.7	5596.11	0	0.942	0.486678	0.486591	59
Task * Position * Symbol	498380	120	4153.16	1432.04	0	0.805	0.124541	0.124454	59
Residual	120473	41540	2.9						59
Source	SS	DF	MS	F	p-unc	np2	eta_sq	omega_sq	neuron_idx
Task	5871.1	1	5871.1	1189.88	4.19403e-257	0.028	0.00190224	0.00190064	60
Position	62172.5	4	15543.1	3150.07	0	0.233	0.020144	0.0201375	60
Symbol	537387	30	17912.9	3630.35	0	0.724	0.174114	0.174066	60
Task * Position	171465	4	42866.2	8687.56	0	0.456	0.0555548	0.0555483	60
Task * Symbol	43009.7	30	1433.66	290.555	0	0.173	0.0139352	0.0138872	60
Position * Symbol	820548	120	6837.9	1385.82	0	0.8	0.265858	0.265666	60
Task * Position * Symbol	1.24099e+06	120	10341.6	2095.9	0	0.858	0.402082	0.40189	60
Residual	204967	41540	4.934						60
Source	SS	DF	MS	F	p-unc	np2	eta_sq	omega_sq	neuron_idx
Task	149162	1	149162	8828.33	0	0.175	0.00353051	0.00353011	62
Position	1.00478e+06	4	251196	14867.3	0	0.589	0.0237822	0.0237806	62
Symbol	1.88786e+07	30	629288	37245.2	0	0.964	0.446838	0.446826	62
Task * Position	6.77633e+06	4	1.69408e+06	100266	0	0.906	0.160389	0.160387	62
Task * Symbol	256023	30	8534.11	505.102	0	0.267	0.00605981	0.00604781	62
Position * Symbol	5.17294e+06	120	43107.8	2551.39	0	0.881	0.122438	0.12239	62
Task * Position * Symbol	9.30964e+06	120	77580.3	4591.69	0	0.93	0.22035	0.220302	62
Residual	701852	41540	16.896						62
Source	SS	DF	MS	F	p-unc	np2	eta_sq	omega_sq	neuron_idx
Task	525907	1	525907	92710.5	0	0.691	0.0441154	0.0441149	66
Position	2.91589e+06	4	728974	128508	0	0.925	0.244598	0.244596	66
Symbol	923579	30	30786	5427.16	0	0.797	0.0774739	0.0774596	66
Task * Position	3.32796e+06	4	831989	146669	0	0.934	0.279164	0.279162	66
Task * Symbol	233193	30	7773.09	1370.29	0	0.497	0.0195612	0.019547	66
Position * Symbol	1.66217e+06	120	13851.4	2441.82	0	0.876	0.13943	0.139373	66
Task * Position * Symbol	2.09682e+06	120	17473.5	3080.35	0	0.899	0.175891	0.175834	66
Residual	235639	41540	5.673						66
Source	SS	DF	MS	F	p-unc	np2	eta_sq	omega_sq	neuron_idx
Task	202083	1	202083	16686.7	0	0.287	0.00958405	0.00958347	67
Position	4.04698e+06	4	1.01174e+06	83543.3	0	0.889	0.191933	0.19193	67
Symbol	4.73927e+06	30	157976	13044.6	0	0.904	0.224765	0.224748	67
Task * Position	475595	4	118899	9817.88	0	0.486	0.0225556	0.0225533	67
Task * Symbol	461669	30	15389	1270.72	0	0.479	0.0218952	0.021878	67
Position * Symbol	6.3715e+06	120	53095.8	4384.31	0	0.927	0.302176	0.302107	67
Task * Position * Symbol	4.28524e+06	120	35710.4	2948.73	0	0.895	0.203233	0.203164	67
Residual	503067	41540	12.11						67
Source	SS	DF	MS	F	p-unc	np2	eta_sq	omega_sq	neuron_idx
Task	221060	1	221060	24198.7	0	0.368	0.0144863	0.0144857	68
Position	351058	4	87764.4	9607.25	0	0.481	0.0230052	0.0230028	68
Symbol	5.2753e+06	30	175843	19249	0	0.933	0.345697	0.345678	68
Task * Position	1.26172e+06	4	315430	34529	0	0.769	0.0826819	0.0826795	68
Task * Symbol	307784	30	10259.5	1123.07	0	0.448	0.0201694	0.0201514	68
Position * Symbol	3.91681e+06	120	32640.1	3572.99	0	0.912	0.256673	0.256601	68
Task * Position * Symbol	3.54671e+06	120	29555.9	3235.38	0	0.903	0.23242	0.232348	68
Residual	379477	41540	9.135						68
Source	SS	DF	MS	F	p-unc	np2	eta_sq	omega_sq	neuron_idx
Task	19763	1	19763	3336.9	0	0.074	0.00416995	0.00416869	70
Position	168015	4	42003.7	7092.16	0	0.406	0.0354508	0.0354458	70
Symbol	1.23673e+06	30	41224.2	6960.53	0	0.834	0.260947	0.260909	70
Task * Position	354076	4	88519	14946.1	0	0.59	0.0747093	0.0747042	70
Task * Symbol	105836	30	3527.85	595.663	0	0.301	0.0223311	0.0222936	70
Position * Symbol	855756	120	7131.3	1204.09	0	0.777	0.180563	0.180413	70
Task * Position * Symbol	1.75319e+06	120	14609.9	2466.82	0	0.877	0.369919	0.369769	70
Residual	246023	41540	5.923						70
Source	SS	DF	MS	F	p-unc	np2	eta_sq	omega_sq	neuron_idx
Task	109.531	1	109.531	28.193	1.10346e-07	0.001	7.92653e-05	7.64536e-05	72
Position	46789.3	4	11697.3	3010.89	0	0.225	0.0338605	0.0338491	72
Symbol	146225	30	4874.15	1254.61	0	0.475	0.10582	0.105735	72
Task * Position	48505.7	4	12126.4	3121.34	0	0.231	0.0351026	0.0350912	72
Task * Symbol	62993.9	30	2099.8	540.488	0	0.281	0.0455874	0.0455029	72
Position * Symbol	401597	120	3346.64	861.425	0	0.713	0.290627	0.290289	72
Task * Position * Symbol	514225	120	4285.2	1103.01	0	0.761	0.372134	0.371795	72
Residual	161383	41540	3.885						72
Source	SS	DF	MS	F	p-unc	np2	eta_sq	omega_sq	neuron_idx
Task	10929.6	1	10929.6	1151.43	5.62555e-249	0.027	0.000293151	0.000292896	73
Position	27600.2	4	6900.04	726.915	0	0.065	0.000740284	0.000739265	73
Symbol	2.4893e+07	30	829768	87415.6	0	0.984	0.667674	0.667666	73
Task * Position	2.65562e+06	4	663905	69942	0	0.871	0.0712283	0.0712272	73
Task * Symbol	25169	30	838.965	88.385	0	0.06	0.000675075	0.000667437	73
Position * Symbol	3.90912e+06	120	32576	3431.86	0	0.908	0.104849	0.104819	73
Task * Position * Symbol	5.36743e+06	120	44728.6	4712.13	0	0.932	0.143964	0.143933	73
Residual	394307	41540	9.492						73
Source	SS	DF	MS	F	p-unc	np2	eta_sq	omega_sq	neuron_idx
Task	975315	1	975315	408478	0	0.908	0.0672821	0.0672819	74
Position	3.95175e+06	4	987938	413764	0	0.976	0.272611	0.272611	74
Symbol	643196	30	21439.9	8979.36	0	0.866	0.0443708	0.0443659	74
Task * Position	4.14419e+06	4	1.03605e+06	433913	0	0.977	0.285887	0.285886	74
Task * Symbol	465713	30	15523.8	6501.61	0	0.824	0.0321272	0.0321223	74
Position * Symbol	2.03833e+06	120	16986.1	7114.04	0	0.954	0.140614	0.140594	74
Task * Position * Symbol	2.17823e+06	120	18151.9	7602.33	0	0.956	0.150265	0.150246	74
Residual	99184.4	41540	2.388						74
Source	SS	DF	MS	F	p-unc	np2	eta_sq	omega_sq	neuron_idx
Task	14153.8	1	14153.8	5325.4	0	0.114	0.00440052	0.00439969	76
Position	242468	4	60617	22807.2	0	0.687	0.0753849	0.0753815	76
Symbol	699097	30	23303.2	8767.87	0	0.864	0.217354	0.217329	76
Task * Position	74452.5	4	18613.1	7003.21	0	0.403	0.0231478	0.0231444	76
Task * Symbol	132709	30	4423.64	1664.4	0	0.546	0.0412601	0.0412353	76
Position * Symbol	1.34559e+06	120	11213.3	4219	0	0.924	0.418353	0.418253	76
Task * Position * Symbol	597526	120	4979.39	1873.5	0	0.844	0.185775	0.185675	76
Residual	110405	41540	2.658						76
Source	SS	DF	MS	F	p-unc	np2	eta_sq	omega_sq	neuron_idx
Task	146.135	1	146.135	40.453	2.03466e-10	0.001	3.40017e-05	3.31613e-05	77
Position	87928.1	4	21982	6085.11	0	0.369	0.0204585	0.0204551	77
Symbol	1.89046e+06	30	63015.4	17444	0	0.926	0.43986	0.439834	77
Task * Position	31298.6	4	7824.64	2166.03	0	0.173	0.00728234	0.00727897	77
Task * Symbol	8109.37	30	270.312	74.828	0	0.051	0.00188683	0.00186162	77
Position * Symbol	1.11846e+06	120	9320.5	2580.12	0	0.882	0.260236	0.260135	77
Task * Position * Symbol	1.01141e+06	120	8428.41	2333.17	0	0.871	0.235328	0.235227	77
Residual	150060	41540	3.612						77
Source	SS	DF	MS	F	p-unc	np2	eta_sq	omega_sq	neuron_idx
Task	38.177	1	38.177	10.926	0.000948932	0	1.11209e-05	1.01031e-05	79
Position	79309.8	4	19827.4	5674.63	0	0.353	0.0231029	0.0230988	79
Symbol	892586	30	29752.9	8515.3	0	0.86	0.26001	0.259979	79
Task * Position	12278.6	4	3069.65	878.537	0	0.078	0.00357675	0.00357268	79
Task * Symbol	6849.21	30	228.307	65.342	0	0.045	0.00199517	0.00196464	79
Position * Symbol	1.46243e+06	120	12186.9	3487.91	0	0.91	0.426005	0.425883	79
Task * Position * Symbol	834257	120	6952.14	1989.71	0	0.852	0.243019	0.242896	79
Residual	145143	41540	3.494						79
Source	SS	DF	MS	F	p-unc	np2	eta_sq	omega_sq	neuron_idx
Task	1.42448e+06	1	1.42448e+06	144505	0	0.777	0.0270126	0.0270124	80
Position	1.28968e+07	4	3.22419e+06	327075	0	0.969	0.244563	0.244562	80
Symbol	2.29857e+06	30	76619	7772.54	0	0.849	0.043588	0.0435824	80
Task * Position	3.19785e+07	4	7.99463e+06	811008	0	0.987	0.606412	0.606411	80
Task * Symbol	305071	30	10169	1031.59	0	0.427	0.00578509	0.00577948	80
Position * Symbol	1.6718e+06	120	13931.6	1413.28	0	0.803	0.0317024	0.03168	80
Task * Position * Symbol	1.74933e+06	120	14577.7	1478.82	0	0.81	0.0331726	0.0331502	80
Residual	409487	41540	9.858						80
Source	SS	DF	MS	F	p-unc	np2	eta_sq	omega_sq	neuron_idx
Task	54733.1	1	54733.1	3386.34	0	0.075	0.0010888	0.00108848	81
Position	9.29565e+06	4	2.32391e+06	143780	0	0.933	0.184917	0.184916	81
Symbol	1.24005e+07	30	413351	25574.1	0	0.949	0.246683	0.246673	81
Task * Position	1.29431e+07	4	3.23578e+06	200198	0	0.951	0.257476	0.257475	81
Task * Symbol	211005	30	7033.51	435.163	0	0.239	0.0041975	0.00418786	81
Position * Symbol	6.52384e+06	120	54365.3	3363.58	0	0.907	0.129778	0.129739	81
Task * Position * Symbol	8.1689e+06	120	68074.2	4211.75	0	0.924	0.162503	0.162464	81
Residual	671408	41540	16.163						81
Source	SS	DF	MS	F	p-unc	np2	eta_sq	omega_sq	neuron_idx
Task	293.884	1	293.884	14.381	0.00014954	0	7.32461e-06	6.81527e-06	82
Position	3.03403e+07	4	7.58508e+06	371161	0	0.973	0.756186	0.756184	82
Symbol	1.48904e+06	30	49634.7	2428.78	0	0.637	0.0371121	0.0370968	82
Task * Position	2.38129e+06	4	595322	29130.9	0	0.737	0.0593499	0.0593479	82
Task * Symbol	275847	30	9194.9	449.935	0	0.245	0.00687507	0.00685979	82
Position * Symbol	1.74797e+06	120	14566.4	712.78	0	0.673	0.0435655	0.0435044	82
Task * Position * Symbol	3.03913e+06	120	25326.1	1239.28	0	0.782	0.0757456	0.0756845	82
Residual	848915	41540	20.436						82
Source	SS	DF	MS	F	p-unc	np2	eta_sq	omega_sq	neuron_idx
Task	8233.81	1	8233.81	3435.55	0	0.076	0.00124022	0.00123986	84
Position	103185	4	25796.2	10763.4	0	0.509	0.0155423	0.0155408	84
Symbol	2.22656e+06	30	74218.5	30967.6	0	0.957	0.335376	0.335365	84
Task * Position	326200	4	81550.1	34026.8	0	0.766	0.0491341	0.0491327	84
Task * Symbol	112516	30	3750.53	1564.91	0	0.531	0.0169478	0.0169369	84
Position * Symbol	916969	120	7641.41	3188.38	0	0.902	0.138119	0.138076	84
Task * Position * Symbol	2.84576e+06	120	23714.7	9894.95	0	0.966	0.428645	0.428601	84
Residual	99556.7	41540	2.397						84
Source	SS	DF	MS	F	p-unc	np2	eta_sq	omega_sq	neuron_idx
Task	84522.7	1	84522.7	6926.91	0	0.143	0.00194072	0.00194044	88
Position	3.39609e+06	4	849022	69580.1	0	0.87	0.0779775	0.0779763	88
Symbol	2.4162e+07	30	805400	66005.1	0	0.979	0.554783	0.554774	88
Task * Position	4.14458e+06	4	1.03615e+06	84915.5	0	0.891	0.0951636	0.0951625	88
Task * Symbol	133651	30	4455.04	365.105	0	0.209	0.00306876	0.00306035	88
Position * Symbol	4.92204e+06	120	41017	3361.47	0	0.907	0.113015	0.112981	88
Task * Position * Symbol	6.20243e+06	120	51686.9	4235.91	0	0.924	0.142414	0.14238	88
Residual	506874	41540	12.202						88
Source	SS	DF	MS	F	p-unc	np2	eta_sq	omega_sq	neuron_idx
Task	893882	1	893882	324571	0	0.887	0.0726382	0.0726379	91
Position	3.28397e+06	4	820993	298105	0	0.966	0.26686	0.266859	91
Symbol	613575	30	20452.5	7426.37	0	0.843	0.04986	0.0498533	91
Task * Position	3.27508e+06	4	818771	297298	0	0.966	0.266138	0.266137	91
Task * Symbol	477341	30	15911.4	5777.47	0	0.807	0.0387894	0.0387827	91
Position * Symbol	1.80416e+06	120	15034.7	5459.13	0	0.94	0.146609	0.146582	91
Task * Position * Symbol	1.84354e+06	120	15362.9	5578.31	0	0.942	0.149809	0.149782	91
Residual	114403	41540	2.754						91
Source	SS	DF	MS	F	p-unc	np2	eta_sq	omega_sq	neuron_idx
Task	849.923	1	849.923	79.789	4.333e-19	0.002	3.59984e-05	3.55472e-05	92
Position	1.4026e+06	4	350651	32918.3	0	0.76	0.0594072	0.0594053	92
Symbol	1.08546e+07	30	361821	33967	0	0.961	0.459747	0.459734	92
Task * Position	986777	4	246694	23159.1	0	0.69	0.0417949	0.041793	92
Task * Symbol	69667.4	30	2322.25	218.007	0	0.136	0.00295076	0.00293722	92
Position * Symbol	4.34919e+06	120	36243.3	3402.43	0	0.908	0.18421	0.184155	92
Task * Position * Symbol	5.50379e+06	120	45865	4305.7	0	0.926	0.233113	0.233058	92
Residual	442491	41540	10.652						92
Source	SS	DF	MS	F	p-unc	np2	eta_sq	omega_sq	neuron_idx
Task	2.54021e+06	1	2.54021e+06	478956	0	0.92	0.0854127	0.0854125	93
Position	9.26426e+06	4	2.31606e+06	436693	0	0.977	0.311503	0.311503	93
Symbol	3.95681e+06	30	131894	24868.5	0	0.947	0.133045	0.133039	93
Task * Position	9.64377e+06	4	2.41094e+06	454582	0	0.978	0.324264	0.324264	93
Task * Symbol	225797	30	7526.57	1419.13	0	0.506	0.00759225	0.0075869	93
Position * Symbol	2.43559e+06	120	20296.6	3826.91	0	0.917	0.0818947	0.0818733	93
Task * Position * Symbol	1.45371e+06	120	12114.3	2284.14	0	0.868	0.0488799	0.0488585	93
Residual	220314	41540	5.304						93
Source	SS	DF	MS	F	p-unc	np2	eta_sq	omega_sq	neuron_idx
Task	21683.5	1	21683.5	1251.51	4.0875e-270	0.029	0.000470135	0.000469759	95
Position	1.03141e+06	4	257853	14882.5	0	0.589	0.0223628	0.0223612	95
Symbol	2.36424e+07	30	788080	45485.6	0	0.97	0.512606	0.512595	95
Task * Position	2.47082e+06	4	617705	35652	0	0.774	0.0535715	0.0535699	95
Task * Symbol	95418.7	30	3180.62	183.576	0	0.117	0.00206884	0.00205757	95
Position * Symbol	1.04813e+07	120	87343.9	5041.23	0	0.936	0.227251	0.227206	95
Task * Position * Symbol	7.65922e+06	120	63826.8	3683.89	0	0.914	0.166065	0.166019	95
Residual	719719	41540	17.326						95
Source	SS	DF	MS	F	p-unc	np2	eta_sq	omega_sq	neuron_idx
Task	7304.43	1	7304.43	618.674	1.4324e-135	0.015	0.000195697	0.00019538	96
Position	132384	4	33096	2803.18	0	0.213	0.00354676	0.0035455	96
Symbol	2.28971e+07	30	763237	64644.9	0	0.979	0.613448	0.613439	96
Task * Position	2.66071e+06	4	665177	56339.5	0	0.844	0.0712845	0.0712832	96
Task * Symbol	36237	30	1207.9	102.307	0	0.069	0.000970844	0.000961354	96
Position * Symbol	4.71591e+06	120	39299.2	3328.59	0	0.906	0.126346	0.126308	96
Task * Position * Symbol	6.38514e+06	120	53209.5	4506.76	0	0.929	0.171068	0.17103	96
Residual	490446	41540	11.807						96
Source	SS	DF	MS	F	p-unc	np2	eta_sq	omega_sq	neuron_idx
Task	44290.6	1	44290.6	2404.8	0	0.055	0.00113439	0.00113392	97
Position	3.54347e+07	4	8.85867e+06	480990	0	0.979	0.907567	0.907564	97
Symbol	678688	30	22622.9	1228.34	0	0.47	0.0173828	0.0173687	97
Task * Position	40684.6	4	10171.1	552.253	0	0.05	0.00104203	0.00104014	97
Task * Symbol	131464	30	4382.14	237.933	0	0.147	0.00336711	0.00335296	97
Position * Symbol	1.14863e+06	120	9571.92	519.717	0	0.6	0.0294192	0.0293625	97
Task * Position * Symbol	800103	120	6667.53	362.02	0	0.511	0.0204926	0.0204359	97
Residual	765065	41540	18.418						97
Source	SS	DF	MS	F	p-unc	np2	eta_sq	omega_sq	neuron_idx
Task	4067.48	1	4067.48	948.256	6.63313e-206	0.022	0.00104808	0.00104697	98
Position	214779	4	53694.9	12517.9	0	0.547	0.0553428	0.0553383	98
Symbol	767768	30	25592.3	5966.35	0	0.812	0.197833	0.1978	98
Task * Position	192964	4	48241.1	11246.5	0	0.52	0.0497217	0.0497172	98
Task * Symbol	58753.3	30	1958.44	456.574	0	0.248	0.0151391	0.0151059	98
Position * Symbol	1.19162e+06	120	9930.14	2315.02	0	0.87	0.307047	0.306914	98
Task * Position * Symbol	1.27276e+06	120	10606.3	2472.66	0	0.877	0.327955	0.327822	98
Residual	178183	41540	4.289						98
Source	SS	DF	MS	F	p-unc	np2	eta_sq	omega_sq	neuron_idx
Task	8631.49	1	8631.49	545.219	8.18506e-120	0.013	0.000241964	0.00024152	101
Position	162865	4	40716.2	2571.89	0	0.198	0.00456554	0.00456376	101
Symbol	2.47581e+07	30	825268	52129.1	0	0.974	0.694034	0.694021	101
Task * Position	1.8582e+06	4	464549	29343.8	0	0.739	0.0520902	0.0520884	101
Task * Symbol	298003	30	9933.45	627.459	0	0.312	0.00835383	0.00834051	101
Position * Symbol	4.33922e+06	120	36160.2	2284.1	0	0.868	0.12164	0.121587	101
Task * Position * Symbol	3.59007e+06	120	29917.3	1889.76	0	0.845	0.100639	0.100586	101
Residual	657629	41540	15.831						101
Source	SS	DF	MS	F	p-unc	np2	eta_sq	omega_sq	neuron_idx
Task	376872	1	376872	49063.6	0	0.542	0.0228611	0.0228606	102
Position	915632	4	228908	29800.7	0	0.742	0.0555423	0.0555404	102
Symbol	6.8271e+06	30	227570	29626.5	0	0.955	0.414132	0.414118	102
Task * Position	884078	4	221020	28773.7	0	0.735	0.0536283	0.0536264	102
Task * Symbol	435052	30	14501.7	1887.93	0	0.577	0.0263903	0.0263763	102
Position * Symbol	2.85814e+06	120	23817.9	3100.76	0	0.9	0.173375	0.173319	102
Task * Position * Symbol	3.86935e+06	120	32244.6	4197.8	0	0.924	0.234715	0.234659	102
Residual	319081	41540	7.681						102
Source	SS	DF	MS	F	p-unc	np2	eta_sq	omega_sq	neuron_idx
Task	2909034	1	2909034	156836	0	0.791	0.0779646	0.077964	103
Position	1.70279e+07	4	4.25698e+06	229509	0	0.957	0.456363	0.456361	103
Symbol	2.76596e+06	30	92198.6	4970.74	0	0.782	0.07413	0.074115	103
Task * Position	3.80199e+06	4	950497	51244.6	0	0.831	0.101896	0.101894	103
Task * Symbol	60891.9	30	2029.73	109.43	0	0.073	0.00163195	0.00161704	103
Position * Symbol	3.88504e+06	120	32375.3	1745.47	0	0.834	0.104122	0.104063	103
Task * Position * Symbol	6.09093e+06	120	50757.7	2736.52	0	0.888	0.163242	0.163182	103
Residual	770494	41540	18.548						103
Source	SS	DF	MS	F	p-unc	np2	eta_sq	omega_sq	neuron_idx
Task	9382.89	1	9382.89	634.221	6.68174e-139	0.015	0.000170708	0.000170439	104
Position	759569	4	189892	12835.5	0	0.553	0.0138193	0.0138182	104
Symbol	2.25172e+07	30	750573	50733.7	0	0.973	0.409668	0.40966	104
Task * Position	1.40235e+07	4	3.50587e+06	236973	0	0.958	0.255137	0.255136	104
Task * Symbol	28006	30	933.535	63.101	0	0.044	0.00050953	0.000501455	104
Position * Symbol	5.35035e+06	120	44586.3	3013.73	0	0.897	0.0973419	0.0973096	104
Task * Position * Symbol	1.1662e+07	120	97183.2	6568.94	0	0.95	0.212173	0.212141	104
Residual	614558	41540	14.794						104
Source	SS	DF	MS	F	p-unc	np2	eta_sq	omega_sq	neuron_idx
Task	140461	1	140461	14354.4	0	0.257	0.0127944	0.0127935	105
Position	3.03835e+06	4	759589	77625.9	0	0.882	0.27676	0.276756	105
Symbol	1.43706e+06	30	47902	4895.33	0	0.78	0.1309	0.130873	105
Task * Position	562937	4	140734	14382.3	0	0.581	0.0512773	0.0512737	105
Task * Symbol	435005	30	14500.2	1481.84	0	0.517	0.0396241	0.0395973	105
Position * Symbol	3.03183e+06	120	25265.3	2581.98	0	0.882	0.276166	0.276059	105
Task * Position * Symbol	1.92616e+06	120	16051.4	1640.37	0	0.826	0.175452	0.175345	105
Residual	406479	41540	9.785						105
Source	SS	DF	MS	F	p-unc	np2	eta_sq	omega_sq	neuron_idx
Task	11573.5	1	11573.5	674.962	1.26507e-147	0.016	0.000218379	0.000218056	106
Position	3.63228e+06	4	908070	52958.2	0	0.836	0.068537	0.0685357	106
Symbol	1.83189e+07	30	610630	35611.6	0	0.963	0.345657	0.345647	106
Task * Position	1.3224e+07	4	3.306e+06	192804	0	0.949	0.249522	0.249521	106
Task * Symbol	259383	30	8646.08	504.235	0	0.267	0.00489426	0.00488455	106
Position * Symbol	5.93946e+06	120	49495.5	2886.55	0	0.893	0.112071	0.112032	106
Task * Position * Symbol	1.08994e+07	120	90828.7	5297.08	0	0.939	0.20566	0.205621	106
Residual	712284	41540	17.147						106
Source	SS	DF	MS	F	p-unc	np2	eta_sq	omega_sq	neuron_idx
Task	272.5	1	272.5	74.652	5.81159e-18	0.002	4.14326e-05	4.08776e-05	107
Position	154971	4	38742.6	10613.6	0	0.505	0.0235627	0.0235605	107
Symbol	1.76981e+06	30	58993.6	16161.4	0	0.921	0.269093	0.269076	107
Task * Position	361948	4	90487.1	24789.1	0	0.705	0.0550329	0.0550307	107
Task * Symbol	15947.8	30	531.593	145.631	0	0.095	0.0024248	0.00240815	107
Position * Symbol	1.86562e+06	120	15546.9	4259.09	0	0.925	0.283661	0.283595	107
Task * Position * Symbol	2.25674e+06	120	18806.2	5151.97	0	0.937	0.343129	0.343062	107
Residual	151633	41540	3.65						107
Source	SS	DF	MS	F	p-unc	np2	eta_sq	omega_sq	neuron_idx
Task	3675.26	1	3675.26	1100.66	3.11097e-238	0.026	0.00129253	0.00129136	108
Position	56154.7	4	14038.7	4204.27	0	0.288	0.0197488	0.019744	108
Symbol	498985	30	16632.8	4981.17	0	0.782	0.175486	0.17545	108
Task * Position	86627.4	4	21656.9	6485.75	0	0.384	0.0304656	0.0304608	108
Task * Symbol	54572.2	30	1819.07	544.772	0	0.282	0.0191922	0.019157	108
Position * Symbol	938478	120	7820.65	2342.11	0	0.871	0.330049	0.329907	108
Task * Position * Symbol	1.06625e+06	120	8885.44	2660.99	0	0.885	0.374985	0.374844	108
Residual	138708	41540	3.339						108
Source	SS	DF	MS	F	p-unc	np2	eta_sq	omega_sq	neuron_idx
Task	19706.7	1	19706.7	3946.15	0	0.087	0.00355921	0.00355831	109
Position	484163	4	121041	24237.8	0	0.7	0.0874446	0.0874409	109
Symbol	1.61547e+06	30	53848.9	10783	0	0.886	0.291769	0.291742	109
Task * Position	40655.5	4	10163.9	2035.26	0	0.164	0.00734278	0.00733916	109
Task * Symbol	124114	30	4137.14	828.439	0	0.374	0.0224162	0.0223891	109
Position * Symbol	2.31268e+06	120	19272.4	3859.19	0	0.918	0.417693	0.417584	109
Task * Position * Symbol	732565	120	6104.71	1222.43	0	0.779	0.132308	0.1322	109
Residual	207446	41540	4.994						109
Source	SS	DF	MS	F	p-unc	np2	eta_sq	omega_sq	neuron_idx
Task	445554	1	445554	32165	0	0.436	0.0268683	0.0268675	110
Position	2.87351e+06	4	718377	51860.2	0	0.833	0.173282	0.173278	110
Symbol	2.61146e+06	30	87048.6	6284.11	0	0.819	0.157479	0.157454	110
Task * Position	3.79738e+06	4	949344	68534	0	0.868	0.228994	0.22899	110
Task * Symbol	392721	30	13090.7	945.028	0	0.406	0.0236823	0.0236572	110
Position * Symbol	2.38268e+06	120	19855.6	1433.39	0	0.805	0.143683	0.143582	110
Task * Position * Symbol	3.50417e+06	120	29201.4	2108.07	0	0.859	0.211312	0.211212	110
Residual	575419	41540	13.852						110
Source	SS	DF	MS	F	p-unc	np2	eta_sq	omega_sq	neuron_idx
Task	64224.6	1	64224.6	14942.9	0	0.265	0.0224327	0.0224311	111
Position	159422	4	39855.4	9273.02	0	0.472	0.0556835	0.0556774	111
Symbol	287992	30	9599.75	2233.54	0	0.617	0.100591	0.100546	111
Task * Position	183051	4	45762.8	10647.5	0	0.506	0.0639369	0.0639308	111
Task * Symbol	186030	30	6201	1442.77	0	0.51	0.0649774	0.0649323	111
Position * Symbol	875383	120	7294.86	1697.27	0	0.831	0.305758	0.305577	111
Task * Position * Symbol	928355	120	7736.29	1799.98	0	0.839	0.32426	0.324079	111
Residual	178539	41540	4.298						111
Source	SS	DF	MS	F	p-unc	np2	eta_sq	omega_sq	neuron_idx
Task	3300.67	1	3300.67	519.631	2.56703e-114	0.012	0.000544598	0.000543549	113
Position	113593	4	28398.3	4470.8	0	0.301	0.0187424	0.0187382	113
Symbol	1.29311e+06	30	43103.7	6785.9	0	0.831	0.213358	0.213326	113
Task * Position	461515	4	115379	18164.3	0	0.636	0.0761481	0.0761439	113
Task * Symbol	37848.7	30	1261.62	198.62	0	0.125	0.0062449	0.00621345	113
Position * Symbol	1.57177e+06	120	13098.1	2062.06	0	0.856	0.259336	0.25921	113
Task * Position * Symbol	2.31575e+06	120	19297.9	3038.11	0	0.898	0.38209	0.381964	113
Residual	263860	41540	6.352						113
Source	SS	DF	MS	F	p-unc	np2	eta_sq	omega_sq	neuron_idx
Task	56487.5	1	56487.5	29208.5	0	0.413	0.0114078	0.0114074	114
Position	305993	4	76498.2	39555.6	0	0.792	0.0617961	0.0617945	114
Symbol	695263	30	23175.4	11983.5	0	0.896	0.14041	0.140398	114
Task * Position	369009	4	92252.1	47701.7	0	0.821	0.0745223	0.0745207	114
Task * Symbol	231194	30	7706.46	3984.85	0	0.742	0.0466902	0.0466785	114
Position * Symbol	1.39613e+06	120	11634.4	6015.92	0	0.946	0.281952	0.281905	114
Task * Position * Symbol	1.81724e+06	120	15143.7	7830.49	0	0.958	0.366997	0.36695	114
Residual	80335.8	41540	1.934						114
Source	SS	DF	MS	F	p-unc	np2	eta_sq	omega_sq	neuron_idx
Task	48621.8	1	48621.8	13142.3	0	0.24	0.0057314	0.00573096	116
Position	477015	4	119254	32233.8	0	0.756	0.0562292	0.0562275	116
Symbol	3.61756e+06	30	120585	32593.7	0	0.959	0.426427	0.426414	116
Task * Position	102352	4	25588.1	6916.34	0	0.4	0.012065	0.0120633	116
Task * Symbol	140517	30	4683.9	1266.04	0	0.478	0.0165638	0.0165507	116
Position * Symbol	2.78138e+06	120	23178.2	6264.97	0	0.948	0.327862	0.327809	116
Task * Position * Symbol	1.16227e+06	120	9685.61	2617.98	0	0.883	0.137005	0.136953	116
Residual	153684	41540	3.7						116
Source	SS	DF	MS	F	p-unc	np2	eta_sq	omega_sq	neuron_idx
Task	1968.31	1	1968.31	564.161	7.02695e-124	0.013	0.000751412	0.000750079	117
Position	47741.5	4	11935.4	3420.94	0	0.248	0.0182255	0.0182202	117
Symbol	951801	30	31726.7	9093.57	0	0.868	0.363355	0.363314	117
Task * Position	94009.1	4	23502.3	6736.27	0	0.393	0.0358885	0.0358831	117
Task * Symbol	31626.1	30	1054.2	302.158	0	0.179	0.0120734	0.0120335	117
Position * Symbol	483924	120	4032.7	1155.86	0	0.77	0.18474	0.18458	117
Task * Position * Symbol	863482	120	7195.68	2062.44	0	0.856	0.329639	0.329478	117
Residual	144929	41540	3.489						117
Source	SS	DF	MS	F	p-unc	np2	eta_sq	omega_sq	neuron_idx
Task	511683	1	511683	38386.2	0	0.48	0.0266033	0.0266026	118
Position	2.59018e+06	4	647545	48578.5	0	0.824	0.134668	0.134665	118
Symbol	4.31406e+06	30	143802	10788	0	0.886	0.224295	0.224274	118
Task * Position	3.72729e+06	4	931822	69904.9	0	0.871	0.193788	0.193785	118
Task * Symbol	403549	30	13451.6	1009.13	0	0.422	0.0209812	0.0209604	118
Position * Symbol	2.84259e+06	120	23688.3	1777.08	0	0.837	0.147791	0.147708	118
Task * Position * Symbol	4.29075e+06	120	35756.3	2682.42	0	0.886	0.223084	0.223	118
Residual	553722	41540	13.33						118
Source	SS	DF	MS	F	p-unc	np2	eta_sq	omega_sq	neuron_idx
Task	76944.1	1	76944.1	20238.7	0	0.328	0.012773	0.0127723	119
Position	730781	4	182695	48054.5	0	0.822	0.121312	0.12131	119
Symbol	1.04318e+06	30	34772.7	9146.3	0	0.869	0.173172	0.173153	119
Task * Position	429801	4	107450	28262.8	0	0.731	0.0713485	0.0713459	119
Task * Symbol	157763	30	5258.76	1383.22	0	0.5	0.0261891	0.0261702	119
Position * Symbol	2.01377e+06	120	16781.4	4414.03	0	0.927	0.334293	0.334217	119
Task * Position * Symbol	1.4138e+06	120	11781.7	3098.95	0	0.9	0.234696	0.23462	119
Residual	157928	41540	3.802						119
Source	SS	DF	MS	F	p-unc	np2	eta_sq	omega_sq	neuron_idx
Task	21369.4	1	21369.4	3397.07	0	0.076	0.000930365	0.000930091	120
Position	2.4343e+06	4	608574	96744.5	0	0.903	0.105983	0.105981	120
Symbol	4.21686e+06	30	140562	22345	0	0.942	0.18359	0.183582	120
Task * Position	5.45833e+06	4	1.36458e+06	216926	0	0.954	0.237641	0.23764	120
Task * Symbol	83790.4	30	2793.01	444.003	0	0.243	0.00364801	0.00363979	120
Position * Symbol	3.35843e+06	120	27986.9	4449.05	0	0.928	0.146217	0.146184	120
Task * Position * Symbol	7.13445e+06	120	59453.7	9451.31	0	0.965	0.310614	0.310581	120
Residual	261309	41540	6.291						120
Source	SS	DF	MS	F	p-unc	np2	eta_sq	omega_sq	neuron_idx
Task	501.666	1	501.666	100.477	1.27415e-23	0.002	2.0205e-05	2.00039e-05	121
Position	12780.9	4	3195.23	639.963	0	0.058	0.000514763	0.000513959	121
Symbol	2.34191e+07	30	780635	156351	0	0.991	0.943223	0.943217	121
Task * Position	25583.5	4	6395.87	1281.01	0	0.11	0.0010304	0.00102959	121
Task * Symbol	758.915	30	25.297	5.067	3.24794e-18	0.004	3.0566e-05	2.4533e-05	121
Position * Symbol	543033	120	4525.27	906.353	0	0.724	0.0218711	0.021847	121
Task * Position * Symbol	619648	120	5163.73	1034.23	0	0.749	0.0249568	0.0249327	121
Residual	207402	41540	4.993						121
Source	SS	DF	MS	F	p-unc	np2	eta_sq	omega_sq	neuron_idx
Task	471838	1	471838	100607	0	0.708	0.0337545	0.0337542	123
Position	2.50757e+06	4	626893	133668	0	0.928	0.179388	0.179386	123
Symbol	1.7695e+06	30	58983.2	12576.6	0	0.901	0.126587	0.126577	123
Task * Position	3.17304e+06	4	793260	169141	0	0.942	0.226994	0.226993	123
Task * Symbol	355533	30	11851.1	2526.93	0	0.646	0.0254343	0.0254242	123
Position * Symbol	2.1499e+06	120	17915.9	3820.07	0	0.917	0.1538	0.15376	123
Task * Position * Symbol	3.35631e+06	120	27969.3	5963.69	0	0.945	0.240105	0.240065	123
Residual	194820	41540	4.69						123
Source	SS	DF	MS	F	p-unc	np2	eta_sq	omega_sq	neuron_idx
Task	3633.89	1	3633.89	701.239	3.02638e-153	0.017	0.000415563	0.00041497	124
Position	189341	4	47335.4	9134.4	0	0.468	0.0216527	0.0216503	124
Symbol	2.41936e+06	30	80645.2	15562.3	0	0.918	0.276672	0.276654	124
Task * Position	394995	4	98748.6	19055.7	0	0.647	0.0451707	0.0451683	124
Task * Symbol	92452.9	30	3081.76	594.694	0	0.3	0.0105727	0.0105549	124
Position * Symbol	2.87883e+06	120	23990.2	4629.44	0	0.93	0.329216	0.329145	124
Task * Position * Symbol	2.55062e+06	120	21255.2	4101.65	0	0.922	0.291683	0.291612	124
Residual	215264	41540	5.182						124
Source	SS	DF	MS	F	p-unc	np2	eta_sq	omega_sq	neuron_idx
Task	81737.9	1	81737.9	30723.7	0	0.425	0.0125887	0.0125883	125
Position	588971	4	147243	55345.7	0	0.842	0.0907093	0.0907076	125
Symbol	995495	30	33183.2	12472.9	0	0.9	0.153319	0.153307	125
Task * Position	744868	4	186217	69995.3	0	0.871	0.114719	0.114718	125
Task * Symbol	274374	30	9145.81	3437.73	0	0.713	0.0422572	0.0422449	125
Position * Symbol	1.61821e+06	120	13485.1	5068.77	0	0.936	0.249225	0.249176	125
Task * Position * Symbol	2.07879e+06	120	17323.2	6511.47	0	0.95	0.320161	0.320111	125
Residual	110514	41540	2.66						125
Source	SS	DF	MS	F	p-unc	np2	eta_sq	omega_sq	neuron_idx
Task	11740.3	1	11740.3	1097.05	1.80398e-237	0.026	0.000316484	0.000316195	126
Position	142524	4	35630.9	3329.47	0	0.243	0.00384202	0.00384086	126
Symbol	2.66186e+07	30	887288	82911.2	0	0.984	0.71756	0.717551	126
Task * Position	1.84976e+06	4	462440	43212	0	0.806	0.0498641	0.049863	126
Task * Symbol	29878	30	995.935	93.064	0	0.063	0.000805424	0.000796769	126
Position * Symbol	2.54693e+06	120	21224.4	1983.28	0	0.851	0.0686576	0.068623	126
Task * Position * Symbol	5.45203e+06	120	45433.6	4245.47	0	0.925	0.146971	0.146936	126
Residual	444547	41540	10.702						126
Source	SS	DF	MS	F	p-unc	np2	eta_sq	omega_sq	neuron_idx
Task	6022.64	1	6022.64	488.891	1.0412e-107	0.012	0.000201822	0.000201409	128
Position	6.0764e+06	4	1.5191e+06	123314	0	0.922	0.203624	0.203622	128
Symbol	7.75906e+06	30	258635	20994.9	0	0.938	0.260011	0.259998	128
Task * Position	2.83595e+06	4	708986	57552.4	0	0.847	0.0950343	0.0950326	128
Task * Symbol	26932.4	30	897.745	72.875	0	0.05	0.00090252	0.000890136	128
Position * Symbol	8.13954e+06	120	67829.5	5506.1	0	0.941	0.272761	0.272711	128
Task * Position * Symbol	4.48565e+06	120	37380.4	3034.38	0	0.898	0.150317	0.150267	128
Residual	511730	41540	12.319						128
Source	SS	DF	MS	F	p-unc	np2	eta_sq	omega_sq	neuron_idx
Task	240183	1	240183	20180.2	0	0.327	0.00791651	0.00791612	129
Position	1.83499e+06	4	458747	38544	0	0.788	0.0604818	0.0604802	129
Symbol	7.20524e+06	30	240175	20179.5	0	0.936	0.237487	0.237475	129
Task * Position	8.41728e+06	4	2.10432e+06	176805	0	0.945	0.277436	0.277434	129
Task * Symbol	251423	30	8380.77	704.154	0	0.337	0.00828699	0.00827522	129
Position * Symbol	2.5141e+06	120	20950.9	1760.29	0	0.836	0.0828656	0.0828185	129
Task * Position * Symbol	9.3819e+06	120	78182.5	6568.9	0	0.95	0.30923	0.309183	129
Residual	494406	41540	11.902						129
Source	SS	DF	MS	F	p-unc	np2	eta_sq	omega_sq	neuron_idx
Task	155469	1	155469	16533	0	0.285	0.00454364	0.00454336	130
Position	2.91081e+06	4	727703	77386.3	0	0.882	0.0850698	0.0850687	130
Symbol	1.2911e+07	30	430366	45766.5	0	0.971	0.377329	0.377321	130
Task * Position	4.14607e+06	4	1.03652e+06	110227	0	0.914	0.121171	0.12117	130
Task * Symbol	377823	30	12594.1	1339.3	0	0.492	0.0110421	0.0110338	130
Position * Symbol	5.99994e+06	120	49999.5	5317.11	0	0.939	0.175351	0.175318	130
Task * Position * Symbol	7.32503e+06	120	61041.9	6491.4	0	0.949	0.214077	0.214044	130
Residual	390622	41540	9.404						130
Source	SS	DF	MS	F	p-unc	np2	eta_sq	omega_sq	neuron_idx
Task	16936.3	1	16936.3	2005.33	0	0.046	0.00066088	0.00066055	131
Position	4.19328e+06	4	1.04832e+06	124126	0	0.923	0.163628	0.163627	131
Symbol	7.04333e+06	30	234778	27798.7	0	0.953	0.274841	0.274831	131
Task * Position	2.67625e+06	4	669062	79219.9	0	0.884	0.104431	0.10443	131
Task * Symbol	35970	30	1199	141.967	0	0.093	0.0014036	0.00139371	131
Position * Symbol	7.03396e+06	120	58616.3	6940.43	0	0.952	0.274476	0.274436	131
Task * Position * Symbol	4.27634e+06	120	35636.2	4219.48	0	0.924	0.166869	0.16683	131
Residual	350831	41540	8.446						131
Source	SS	DF	MS	F	p-unc	np2	eta_sq	omega_sq	neuron_idx
Task	5007.28	1	5007.28	659.613	2.43882e-144	0.016	0.000303706	0.000303246	132
Position	1.79454e+06	4	448636	59099.2	0	0.851	0.108844	0.108843	132
Symbol	2.66953e+06	30	88984.4	11722	0	0.894	0.161915	0.161901	132
Task * Position	3.62895e+06	4	907239	119511	0	0.92	0.220107	0.220105	132
Task * Symbol	30387.3	30	1012.91	133.431	0	0.088	0.00184308	0.00182927	132
Position * Symbol	2.75299e+06	120	22941.6	3022.12	0	0.897	0.166977	0.166922	132
Task * Position * Symbol	5.29048e+06	120	44087.3	5807.67	0	0.944	0.320883	0.320828	132
Residual	315340	41540	7.591						132
Source	SS	DF	MS	F	p-unc	np2	eta_sq	omega_sq	neuron_idx
Task	5019.05	1	5019.05	604.293	1.73147e-132	0.014	0.000197636	0.000197309	133
Position	3.37243e+06	4	843108	101510	0	0.907	0.132797	0.132796	133
Symbol	8.69323e+06	30	289774	34888.8	0	0.962	0.342315	0.342305	133
Task * Position	2.02513e+06	4	506282	60956.4	0	0.854	0.0797439	0.0797426	133
Task * Symbol	36558.1	30	1218.6	146.72	0	0.096	0.00143956	0.00142974	133
Position * Symbol	6.88384e+06	120	57365.4	6906.79	0	0.952	0.271067	0.271027	133
Task * Position * Symbol	4.03417e+06	120	33618.1	4047.62	0	0.921	0.158855	0.158815	133
Residual	345017	41540	8.306						133
Source	SS	DF	MS	F	p-unc	np2	eta_sq	omega_sq	neuron_idx
Task	12548.2	1	12548.2	1224.07	2.52253e-264	0.029	0.000862725	0.00086202	134
Position	284832	4	71207.9	6946.27	0	0.401	0.019583	0.0195801	134
Symbol	5.9487e+06	30	198290	19343	0	0.933	0.40899	0.408968	134
Task * Position	3.01027e+06	4	752566	73412.2	0	0.876	0.206964	0.206961	134
Task * Symbol	82792.9	30	2759.76	269.213	0	0.163	0.00569224	0.0056711	134
Position * Symbol	1.21513e+06	120	10126.1	987.788	0	0.74	0.0835433	0.0834587	134
Task * Position * Symbol	3.56477e+06	120	29706.4	2897.83	0	0.893	0.245088	0.245003	134
Residual	425837	41540	10.251						134
Source	SS	DF	MS	F	p-unc	np2	eta_sq	omega_sq	neuron_idx
Task	101753	1	101753	12211.9	0	0.227	0.00535077	0.00535033	135
Position	2.33701e+06	4	584253	70119.2	0	0.871	0.122894	0.122892	135
Symbol	3.33199e+06	30	111066	13329.6	0	0.906	0.175216	0.175203	135
Task * Position	5.28036e+06	4	1.32009e+06	158431	0	0.938	0.277674	0.277672	135
Task * Symbol	84490.1	30	2816.34	338.003	0	0.196	0.004443	0.00442986	135
Position * Symbol	2.27904e+06	120	18992	2279.33	0	0.868	0.119846	0.119793	135
Task * Position * Symbol	5.25567e+06	120	43797.3	5256.34	0	0.938	0.276375	0.276323	135
Residual	346123	41540	8.332						135
Source	SS	DF	MS	F	p-unc	np2	eta_sq	omega_sq	neuron_idx
Task	104316	1	104316	12432.5	0	0.23	0.00353749	0.00353721	136
Position	1.23431e+06	4	308576	36776.4	0	0.78	0.0418567	0.0418556	136
Symbol	7.95758e+06	30	265253	31613	0	0.958	0.269851	0.269842	136
Task * Position	7.09981e+06	4	1.77495e+06	211540	0	0.953	0.240763	0.240762	136
Task * Symbol	167521	30	5584.03	665.509	0	0.325	0.00568083	0.0056723	136
Position * Symbol	2.45938e+06	120	20494.8	2442.59	0	0.876	0.0834003	0.0833662	136
Task * Position * Symbol	1.01173e+07	120	84311.2	10048.3	0	0.967	0.343091	0.343057	136
Residual	348546	41540	8.391						136
Source	SS	DF	MS	F	p-unc	np2	eta_sq	omega_sq	neuron_idx
Task	50678.1	1	50678.1	7837.94	0	0.159	0.00211239	0.00211212	137
Position	5.03803e+06	4	1.25951e+06	194797	0	0.949	0.209997	0.209996	137
Symbol	2.07372e+06	30	69124	10690.8	0	0.885	0.0864377	0.0864296	137
Task * Position	8.49945e+06	4	2.12486e+06	328634	0	0.969	0.354278	0.354277	137
Task * Symbol	40499.7	30	1349.99	208.791	0	0.131	0.00168812	0.00168004	137
Position * Symbol	3.02311e+06	120	25192.6	3896.32	0	0.918	0.126011	0.125978	137
Task * Position * Symbol	4.99685e+06	120	41640.4	6440.16	0	0.949	0.208281	0.208248	137
Residual	268587	41540	6.466						137
Source	SS	DF	MS	F	p-unc	np2	eta_sq	omega_sq	neuron_idx
Task	45719.5	1	45719.5	13143.8	0	0.24	0.0099931	0.00999234	138
Position	430489	4	107622	30940	0	0.749	0.0940937	0.0940906	138
Symbol	1.37854e+06	30	45951.3	13210.4	0	0.905	0.301313	0.30129	138
Task * Position	457201	4	114300	32859.8	0	0.76	0.0999322	0.0999291	138
Task * Symbol	50674.1	30	1689.13	485.604	0	0.26	0.011076	0.0110532	138
Position * Symbol	1.24737e+06	120	10394.8	2988.36	0	0.896	0.272643	0.272552	138
Task * Position * Symbol	820620	120	6838.5	1965.98	0	0.85	0.179366	0.179275	138
Residual	144494	41540	3.478						138
Source	SS	DF	MS	F	p-unc	np2	eta_sq	omega_sq	neuron_idx
Task	340.517	1	340.517	36.081	1.90849e-09	0.001	6.43253e-06	6.25424e-06	139
Position	1.01571e+06	4	253927	26906	0	0.722	0.0191872	0.0191865	139
Symbol	4.37215e+07	30	1.45738e+06	154424	0	0.991	0.825921	0.825916	139
Task * Position	66112	4	16528	1751.3	0	0.144	0.00124889	0.00124817	139
Task * Symbol	14091.7	30	469.725	49.772	3.42634e-290	0.035	0.0002662	0.000260851	139
Position * Symbol	3.49023e+06	120	29085.3	3081.87	0	0.899	0.0659322	0.0659108	139
Task * Position * Symbol	4.23664e+06	120	35305.4	3740.95	0	0.915	0.0800323	0.0800109	139
Residual	392036	41540	9.438						139
Source	SS	DF	MS	F	p-unc	np2	eta_sq	omega_sq	neuron_idx
Task	9331.82	1	9331.82	1723.94	0	0.04	0.000561813	0.000561487	140
Position	1.86424e+06	4	466060	86099.2	0	0.892	0.112235	0.112233	140
Symbol	2.42828e+06	30	80942.6	14953.2	0	0.915	0.146192	0.146182	140
Task * Position	3.16282e+06	4	790706	146074	0	0.934	0.190415	0.190413	140
Task * Symbol	10676.4	30	355.88	65.745	0	0.045	0.000642762	0.000632985	140
Position * Symbol	3.35074e+06	120	27922.8	5158.41	0	0.937	0.201728	0.201689	140
Task * Position * Symbol	5.55924e+06	120	46327	8558.37	0	0.961	0.334689	0.334649	140
Residual	224859	41540	5.413						140
Source	SS	DF	MS	F	p-unc	np2	eta_sq	omega_sq	neuron_idx
Task	2573.55	1	2573.55	352.772	2.23218e-78	0.008	0.000160132	0.000159678	141
Position	2.56657e+06	4	641641	87953.9	0	0.894	0.159698	0.159696	141
Symbol	3.71145e+06	30	123715	16958.4	0	0.925	0.230935	0.230921	141
Task * Position	292671	4	73167.8	10029.6	0	0.491	0.0182107	0.0182088	141
Task * Symbol	12707.6	30	423.586	58.064	0	0.04	0.000790695	0.000777077	141
Position * Symbol	7.09613e+06	120	59134.4	8105.93	0	0.959	0.441538	0.441483	141
Task * Position * Symbol	2.08627e+06	120	17385.6	2383.15	0	0.873	0.129812	0.129758	141
Residual	303043	41540	7.295						141
Source	SS	DF	MS	F	p-unc	np2	eta_sq	omega_sq	neuron_idx
Task	14422.6	1	14422.6	2224.18	0	0.051	0.000656941	0.000656646	143
Position	4.1715e+06	4	1.04288e+06	160827	0	0.939	0.190009	0.190008	143
Symbol	2.41897e+06	30	80632.3	12434.7	0	0.9	0.110182	0.110174	143
Task * Position	6.4299e+06	4	1.60748e+06	247896	0	0.96	0.292878	0.292877	143
Task * Symbol	28870.1	30	962.335	148.406	0	0.097	0.00131501	0.00130615	143
Position * Symbol	3.43384e+06	120	28615.3	4412.9	0	0.927	0.156409	0.156374	143
Task * Position * Symbol	5.18734e+06	120	43227.8	6666.35	0	0.951	0.23628	0.236244	143
Residual	269365	41540	6.484						143
Source	SS	DF	MS	F	p-unc	np2	eta_sq	omega_sq	neuron_idx
Task	108558	1	108558	14737.6	0	0.262	0.00563951	0.00563913	144
Position	907507	4	226877	30800.2	0	0.748	0.0471442	0.0471427	144
Symbol	5.41514e+06	30	180505	24504.8	0	0.947	0.281312	0.2813	144
Task * Position	3.3379e+06	4	834476	113286	0	0.916	0.173401	0.1734	144
Task * Symbol	200628	30	6687.59	907.889	0	0.396	0.0104224	0.010411	144
Position * Symbol	2.01258e+06	120	16771.5	2276.85	0	0.868	0.104552	0.104506	144
Task * Position * Symbol	6.96128e+06	120	58010.7	7875.37	0	0.958	0.361633	0.361587	144
Residual	305987	41540	7.366						144
Source	SS	DF	MS	F	p-unc	np2	eta_sq	omega_sq	neuron_idx
Task	14062.1	1	14062.1	1166.38	3.87791e-252	0.027	0.000474293	0.000473886	145
Position	4.81281e+06	4	1.2032e+06	99799.4	0	0.906	0.162328	0.162327	145
Symbol	3.71133e+06	30	123711	10261.2	0	0.881	0.125177	0.125165	145
Task * Position	1.05635e+07	4	2.64087e+06	219047	0	0.955	0.35629	0.356288	145
Task * Symbol	41015.3	30	1367.18	113.4	0	0.076	0.00138338	0.00137118	145
Position * Symbol	3.2066e+06	120	26721.7	2216.43	0	0.865	0.108154	0.108105	145
Task * Position * Symbol	6.79844e+06	120	56653.7	4699.14	0	0.931	0.229301	0.229252	145
Residual	500814	41540	12.056						145
Source	SS	DF	MS	F	p-unc	np2	eta_sq	omega_sq	neuron_idx
Task	2938.78	1	2938.78	533.302	2.96786e-117	0.013	0.00015345	0.000153162	146
Position	2.60355e+06	4	650886	118117	0	0.919	0.135945	0.135944	146
Symbol	2.52824e+06	30	84274.8	15293.4	0	0.917	0.132013	0.132004	146
Task * Position	4.45216e+06	4	1.11304e+06	201984	0	0.951	0.232471	0.23247	146
Task * Symbol	9528.1	30	317.603	57.636	0	0.04	0.000497513	0.00048888	146
Position * Symbol	3.47129e+06	120	28927.4	5249.47	0	0.938	0.181255	0.18122	146
Task * Position * Symbol	5.85485e+06	120	48790.5	8854.02	0	0.962	0.305713	0.305678	146
Residual	228908	41540	5.511						146
Source	SS	DF	MS	F	p-unc	np2	eta_sq	omega_sq	neuron_idx
Task	178428	1	178428	16485.5	0	0.284	0.00613044	0.00613007	147
Position	1.67809e+06	4	419524	38761.1	0	0.789	0.0576561	0.0576546	147
Symbol	7.2942e+06	30	243140	22464.5	0	0.942	0.250615	0.250604	147
Task * Position	7.62666e+06	4	1.90666e+06	176163	0	0.944	0.262037	0.262036	147
Task * Symbol	183181	30	6106.03	564.156	0	0.289	0.00629375	0.00628259	147
Position * Symbol	2.33427e+06	120	19452.3	1797.26	0	0.838	0.0802011	0.0801564	147
Task * Position * Symbol	9.36078e+06	120	78006.5	7207.27	0	0.954	0.321619	0.321574	147
Residual	449600	41540	10.823						147
Source	SS	DF	MS	F	p-unc	np2	eta_sq	omega_sq	neuron_idx
Task	12297.6	1	12297.6	1192.83	9.98939e-258	0.028	0.000412879	0.000412533	148
Position	1.19636e+06	4	299091	29010.8	0	0.736	0.0401666	0.0401652	148
Symbol	7.89151e+06	30	263050	25515	0	0.949	0.264949	0.264939	148
Task * Position	6.9942e+06	4	1.74855e+06	169604	0	0.942	0.234823	0.234821	148
Task * Symbol	9398.38	30	313.279	30.387	2.2539e-170	0.021	0.000315541	0.000305156	148
Position * Symbol	2.74774e+06	120	22897.8	2221.01	0	0.865	0.0922524	0.0922108	148
Task * Position * Symbol	1.05052e+07	120	87543.7	8491.45	0	0.961	0.352702	0.352661	148
Residual	428262	41540	10.31						148
Source	SS	DF	MS	F	p-unc	np2	eta_sq	omega_sq	neuron_idx
Task	901645	1	901645	181851	0	0.814	0.0363155	0.0363153	149
Position	9.11304e+06	4	2.27826e+06	459498	0	0.978	0.367045	0.367044	149
Symbol	171286	30	5709.55	1151.55	0	0.454	0.00689889	0.0068929	149
Task * Position	1.36083e+07	4	3.40208e+06	686159	0	0.985	0.548101	0.5481	149
Task * Symbol	17762.6	30	592.087	119.417	0	0.079	0.000715423	0.000709432	149
Position * Symbol	364183	120	3034.86	612.096	0	0.639	0.0146682	0.0146442	149
Task * Position * Symbol	445922	120	3716.01	749.476	0	0.684	0.0179603	0.0179364	149
Residual	205961	41540	4.958						149
Source	SS	DF	MS	F	p-unc	np2	eta_sq	omega_sq	neuron_idx
Task	180059	1	180059	18405.7	0	0.307	0.00679692	0.00679655	150
Position	1.45792e+06	4	364481	37257.3	0	0.782	0.0550342	0.0550327	150
Symbol	6.81962e+06	30	227321	23236.8	0	0.944	0.25743	0.257418	150
Task * Position	6.34652e+06	4	1.58663e+06	162186	0	0.94	0.239571	0.239569	150
Task * Symbol	214252	30	7141.72	730.029	0	0.345	0.00808765	0.00807657	150
Position * Symbol	2.25786e+06	120	18815.5	1923.32	0	0.847	0.0852304	0.085186	150
Task * Position * Symbol	8.80861e+06	120	73405.1	7503.49	0	0.956	0.332511	0.332466	150
Residual	406377	41540	9.783						150
Source	SS	DF	MS	F	p-unc	np2	eta_sq	omega_sq	neuron_idx
Task	225.941	1	225.941	18.414	1.78186e-05	0	8.26637e-06	7.81745e-06	151
Position	4.1347e+06	4	1.03368e+06	84241.9	0	0.89	0.151274	0.151272	151
Symbol	8.27658e+06	30	275886	22484	0	0.942	0.30281	0.302797	151
Task * Position	2.45981e+06	4	614953	50117.1	0	0.828	0.0899957	0.0899939	151
Task * Symbol	54606.7	30	1820.22	148.344	0	0.097	0.00199786	0.0019844	151
Position * Symbol	7.18569e+06	120	59880.7	4880.13	0	0.934	0.262899	0.262845	151
Task * Position * Symbol	4.71123e+06	120	39260.3	3199.61	0	0.902	0.172367	0.172313	151
Residual	509709	41540	12.27						151
Source	SS	DF	MS	F	p-unc	np2	eta_sq	omega_sq	neuron_idx
Task	27376	1	27376	5064.92	0	0.109	0.00148078	0.00148049	152
Position	2.58216e+06	4	645541	119433	0	0.92	0.13967	0.139669	152
Symbol	2.54874e+06	30	84958	15718.3	0	0.919	0.137862	0.137854	152
Task * Position	4.57918e+06	4	1.14479e+06	211802	0	0.953	0.24769	0.247689	152
Task * Symbol	40171.1	30	1339.04	247.739	0	0.152	0.00217288	0.0021641	152
Position * Symbol	3.05399e+06	120	25449.9	4708.56	0	0.932	0.165191	0.165156	152
Task * Position * Symbol	5.43141e+06	120	45261.8	8374.01	0	0.96	0.293788	0.293752	152
Residual	224525	41540	5.405						152
Source	SS	DF	MS	F	p-unc	np2	eta_sq	omega_sq	neuron_idx
Task	215519	1	215519	28001.7	0	0.403	0.010241	0.0102406	153
Position	1.61194e+06	4	402985	52358.4	0	0.834	0.0765954	0.0765939	153
Symbol	3.79965e+06	30	126655	16455.8	0	0.922	0.18055	0.180539	153
Task * Position	4.32307e+06	4	1.08077e+06	140420	0	0.931	0.205421	0.20542	153
Task * Symbol	454197	30	15139.9	1967.07	0	0.587	0.0215823	0.0215713	153
Position * Symbol	3.5075e+06	120	29229.2	3797.64	0	0.916	0.166668	0.166624	153
Task * Position * Symbol	6.81327e+06	120	56777.3	7376.87	0	0.955	0.32375	0.323706	153
Residual	319719	41540	7.697						153
Source	SS	DF	MS	F	p-unc	np2	eta_sq	omega_sq	neuron_idx
Task	86659.2	1	86659.2	10213.6	0	0.197	0.00398966	0.00398927	154
Position	551573	4	137893	16252	0	0.61	0.0253936	0.025392	154
Symbol	7.63248e+06	30	254416	29985.3	0	0.956	0.351388	0.351376	154
Task * Position	4.06549e+06	4	1.01637e+06	119789	0	0.92	0.187169	0.187167	154
Task * Symbol	129313	30	4310.42	508.022	0	0.268	0.00595335	0.00594163	154
Position * Symbol	1.17329e+06	120	9777.46	1152.36	0	0.769	0.0540167	0.0539698	154
Task * Position * Symbol	7.72969e+06	120	64414.1	7591.79	0	0.956	0.355863	0.355816	154
Residual	352454	41540	8.485						154
Source	SS	DF	MS	F	p-unc	np2	eta_sq	omega_sq	neuron_idx
Task	62741.8	1	62741.8	6268.2	0	0.131	0.00218161	0.00218126	155
Position	2.05656e+06	4	514141	51365.1	0	0.832	0.0715094	0.071508	155
Symbol	1.071e+07	30	356999	35665.9	0	0.963	0.3724	0.372389	155
Task * Position	3.1236e+06	4	780899	78015.5	0	0.883	0.108612	0.10861	155
Task * Symbol	309556	30	10318.5	1030.87	0	0.427	0.0107637	0.0107532	155
Position * Symbol	5.58796e+06	120	46566.3	4652.2	0	0.931	0.194301	0.194259	155
Task * Position * Symbol	6.49316e+06	120	54109.6	5405.81	0	0.94	0.225776	0.225734	155
Residual	415796	41540	10.01						155
Source	SS	DF	MS	F	p-unc	np2	eta_sq	omega_sq	neuron_idx
Task	224192	1	224192	27632.4	0	0.399	0.00942613	0.00942579	156
Position	1.23861e+06	4	309652	38165.5	0	0.786	0.052077	0.0520757	156
Symbol	6.37631e+06	30	212544	26196.7	0	0.95	0.268091	0.268081	156
Task * Position	4.72117e+06	4	1.18029e+06	145475	0	0.933	0.198501	0.1985	156
Task * Symbol	344883	30	11496.1	1416.93	0	0.506	0.0145006	0.0144903	156
Position * Symbol	2.35278e+06	120	19606.5	2416.56	0	0.875	0.0989224	0.0988814	156
Task * Position * Symbol	8.18914e+06	120	68242.8	8411.13	0	0.96	0.344311	0.34427	156
Residual	337030	41540	8.113						156
Source	SS	DF	MS	F	p-unc	np2	eta_sq	omega_sq	neuron_idx
Task	19199.4	1	19199.4	1984.3	0	0.046	0.000738625	0.000738252	157
Position	3.20792e+06	4	801980	82886.4	0	0.889	0.123413	0.123411	157
Symbol	6.70486e+06	30	223495	23098.7	0	0.943	0.257944	0.257932	157
Task * Position	4.06359e+06	4	1.0159e+06	104995	0	0.91	0.156331	0.15633	157
Task * Symbol	25239.4	30	841.314	86.952	0	0.059	0.000970991	0.000959823	157
Position * Symbol	6.5847e+06	120	54872.5	5671.19	0	0.942	0.253321	0.253277	157
Task * Position * Symbol	4.98604e+06	120	41550.4	4294.32	0	0.925	0.191819	0.191774	157
Residual	401927	41540	9.676						157
Source	SS	DF	MS	F	p-unc	np2	eta_sq	omega_sq	neuron_idx
Task	113154	1	113154	11374.8	0	0.215	0.00385551	0.00385517	158
Position	3.26191e+06	4	815477	81975.6	0	0.888	0.111143	0.111142	158
Symbol	1.04771e+07	30	349238	35107.1	0	0.962	0.356988	0.356978	158
Task * Position	2.35929e+06	4	589822	59291.7	0	0.851	0.0803882	0.0803868	158
Task * Symbol	388479	30	12949.3	1301.73	0	0.485	0.0132367	0.0132265	158
Position * Symbol	6.23834e+06	120	51986.1	5225.89	0	0.938	0.212559	0.212518	158
Task * Position * Symbol	6.09716e+06	120	50809.7	5107.63	0	0.937	0.207749	0.207708	158
Residual	413232	41540	9.948						158
Source	SS	DF	MS	F	p-unc	np2	eta_sq	omega_sq	neuron_idx
Task	305.05	1	305.05	27.465	1.6073e-07	0.001	1.22268e-05	1.17816e-05	159
Position	5.22083e+06	4	1.30521e+06	117514	0	0.919	0.209257	0.209256	159
Symbol	5.98992e+06	30	199664	17976.8	0	0.928	0.240084	0.24007	159
Task * Position	1.29271e+06	4	323177	29097.2	0	0.737	0.0518134	0.0518116	159
Task * Symbol	45251.5	30	1508.38	135.807	0	0.089	0.00181374	0.00180038	159
Position * Symbol	8.27498e+06	120	68958.2	6208.65	0	0.947	0.331672	0.331618	159
Task * Position * Symbol	3.66393e+06	120	30532.8	2749.02	0	0.888	0.146855	0.146802	159
Residual	461376	41540	11.107						159
Source	SS	DF	MS	F	p-unc	np2	eta_sq	omega_sq	neuron_idx
Task	8118.01	1	8118.01	14319	0	0.256	0.00566503	0.00566463	160
Position	100489	4	25122.2	44312	0	0.81	0.0701247	0.0701231	160
Symbol	217524	30	7250.82	12789.4	0	0.902	0.151796	0.151784	160
Task * Position	80836.1	4	20209	35645.8	0	0.774	0.0564103	0.0564087	160
Task * Symbol	45960.1	30	1532	2702.23	0	0.661	0.0320726	0.0320607	160
Position * Symbol	396073	120	3300.61	5821.79	0	0.944	0.276393	0.276346	160
Task * Position * Symbol	560452	120	4670.44	8237.97	0	0.96	0.391103	0.391056	160
Residual	23550.7	41540	0.567						160
Source	SS	DF	MS	F	p-unc	np2	eta_sq	omega_sq	neuron_idx
Task	25458.4	1	25458.4	2744.67	0	0.062	0.000807291	0.000806997	161
Position	1.47812e+06	4	369529	39838.8	0	0.793	0.0468714	0.0468702	161
Symbol	7.67069e+06	30	255690	27565.8	0	0.952	0.243239	0.24323	161
Task * Position	8.10287e+06	4	2.02572e+06	218392	0	0.955	0.256944	0.256942	161
Task * Symbol	37949.8	30	1264.99	136.379	0	0.09	0.00120339	0.00119457	161
Position * Symbol	3.22173e+06	120	26847.8	2894.45	0	0.893	0.102162	0.102126	161
Task * Position * Symbol	1.06135e+07	120	88445.6	9535.3	0	0.965	0.336555	0.33652	161
Residual	385308	41540	9.276						161
Source	SS	DF	MS	F	p-unc	np2	eta_sq	omega_sq	neuron_idx
Task	14659.6	1	14659.6	1758.41	0	0.041	0.000487093	0.000486816	162
Position	1.18859e+06	4	297147	35642.6	0	0.774	0.0394931	0.039492	162
Symbol	7.31459e+06	30	243820	29246.1	0	0.955	0.243042	0.243033	162
Task * Position	7.07892e+06	4	1.76973e+06	212278	0	0.953	0.235211	0.23521	162
Task * Symbol	12983	30	432.767	51.91	2.21064e-303	0.036	0.000431386	0.000423075	162
Position * Symbol	3.44054e+06	120	28671.2	3439.09	0	0.909	0.114319	0.114285	162
Task * Position * Symbol	1.06995e+07	120	89162.1	10695	0	0.969	0.35551	0.355477	162
Residual	346312	41540	8.337						162
Source	SS	DF	MS	F	p-unc	np2	eta_sq	omega_sq	neuron_idx
Task	639.919	1	639.919	84.335	4.36331e-20	0.002	3.39659e-05	3.35632e-05	163
Position	1.95473e+06	4	488682	64403.4	0	0.861	0.103754	0.103752	163
Symbol	6.3269e+06	30	210897	27794.1	0	0.953	0.335822	0.33581	163
Task * Position	1.16909e+06	4	292272	38518.5	0	0.788	0.0620534	0.0620517	163
Task * Symbol	2451.1	30	81.703	10.768	1.24439e-50	0.008	0.000130101	0.000118018	163
Position * Symbol	5.51444e+06	120	45953.6	6056.23	0	0.946	0.292698	0.292649	163
Task * Position * Symbol	3.55659e+06	120	29638.2	3906.02	0	0.919	0.188778	0.18873	163
Residual	315198	41540	7.588						163
Source	SS	DF	MS	F	p-unc	np2	eta_sq	omega_sq	neuron_idx
Task	297525	1	297525	23835.1	0	0.365	0.00902071	0.00902033	164
Position	2.77133e+06	4	692833	55503.5	0	0.842	0.0840244	0.0840228	164
Symbol	1.23483e+07	30	411610	32974.5	0	0.96	0.37439	0.374378	164
Task * Position	3.83793e+06	4	959483	76865.2	0	0.881	0.116363	0.116361	164
Task * Symbol	446082	30	14869.4	1191.2	0	0.462	0.0135248	0.0135135	164
Position * Symbol	5.29361e+06	120	44113.4	3533.97	0	0.911	0.160498	0.160452	164
Task * Position * Symbol	7.46916e+06	120	62243	4986.35	0	0.935	0.226459	0.226413	164
Residual	518530	41540	12.483						164
Source	SS	DF	MS	F	p-unc	np2	eta_sq	omega_sq	neuron_idx
Task	242041	1	242041	27037.2	0	0.394	0.00792413	0.00792383	165
Position	1.87531e+06	4	468828	52370.4	0	0.835	0.0613954	0.0613942	165
Symbol	1.18142e+07	30	393806	43990.1	0	0.969	0.386782	0.386773	165
Task * Position	3.76536e+06	4	941339	105152	0	0.91	0.123273	0.123272	165
Task * Symbol	454069	30	15135.6	1690.73	0	0.55	0.0148657	0.0148569	165
Position * Symbol	4.81636e+06	120	40136.4	4483.43	0	0.928	0.157682	0.157647	165
Task * Position * Symbol	7.20562e+06	120	60046.8	6707.52	0	0.951	0.235903	0.235868	165
Residual	371873	41540	8.952						165
Source	SS	DF	MS	F	p-unc	np2	eta_sq	omega_sq	neuron_idx
Task	10144.9	1	10144.9	860.014	3.943e-187	0.02	0.000376289	0.000375852	166
Position	5.76155e+06	4	1.44039e+06	122105	0	0.922	0.213703	0.213702	166
Symbol	6.66481e+06	30	222160	18833.1	0	0.932	0.247206	0.247193	166
Task * Position	1.88229e+06	4	470574	39891.8	0	0.793	0.0698168	0.069815	166
Task * Symbol	29021	30	967.366	82.006	0	0.056	0.00107643	0.0010633	166
Position * Symbol	7.59237e+06	120	63269.7	5363.54	0	0.939	0.281611	0.281558	166
Task * Position * Symbol	4.53029e+06	120	37752.4	3200.37	0	0.902	0.168034	0.167982	166
Residual	490016	41540	11.796						166
Source	SS	DF	MS	F	p-unc	np2	eta_sq	omega_sq	neuron_idx
Task	134703	1	134703	16794.5	0	0.288	0.00619881	0.00619844	167
Position	1.01528e+06	4	253821	31645.9	0	0.753	0.0467217	0.0467202	167
Symbol	5.94366e+06	30	198122	24701.5	0	0.947	0.273518	0.273507	167
Task * Position	4.06965e+06	4	1.01741e+06	126849	0	0.924	0.187279	0.187277	167
Task * Symbol	268839	30	8961.31	1117.28	0	0.447	0.0123716	0.0123605	167
Position * Symbol	2.1771e+06	120	18142.5	2261.98	0	0.867	0.100187	0.100143	167
Task * Position * Symbol	7.788e+06	120	64900	8091.63	0	0.959	0.358392	0.358347	167
Residual	333177	41540	8.021						167
Source	SS	DF	MS	F	p-unc	np2	eta_sq	omega_sq	neuron_idx
Task	15664.6	1	15664.6	1841.58	0	0.042	0.000608851	0.000608521	168
Position	3.78212e+06	4	945530	111159	0	0.915	0.147003	0.147002	168
Symbol	7.64616e+06	30	254872	29963.5	0	0.956	0.29719	0.29718	168
Task * Position	2.18909e+06	4	547273	64339.2	0	0.861	0.0850855	0.0850841	168
Task * Symbol	42768.7	30	1425.62	167.601	0	0.108	0.00166233	0.00165241	168
Position * Symbol	7.75911e+06	120	64659.2	7601.54	0	0.956	0.30158	0.30154	168
Task * Position * Symbol	3.93992e+06	120	32832.7	3859.91	0	0.918	0.153136	0.153097	168
Residual	353342	41540	8.506						168
Source	SS	DF	MS	F	p-unc	np2	eta_sq	omega_sq	neuron_idx
Task	4204.55	1	4204.55	530.882	9.82194e-117	0.013	0.000258025	0.000257539	169
Position	2.87574e+06	4	718935	90775.6	0	0.897	0.176479	0.176477	169
Symbol	4.27006e+06	30	142335	17971.8	0	0.928	0.262046	0.262031	169
Task * Position	261348	4	65337	8249.7	0	0.443	0.0160384	0.0160365	169
Task * Symbol	10530.9	30	351.029	44.322	1.54371e-256	0.031	0.00064626	0.000631678	169
Position * Symbol	6.81413e+06	120	56784.4	7169.82	0	0.954	0.418171	0.418112	169
Task * Position * Symbol	1.73009e+06	120	14417.4	1820.4	0	0.84	0.106172	0.106114	169
Residual	328994	41540	7.92						169
Source	SS	DF	MS	F	p-unc	np2	eta_sq	omega_sq	neuron_idx
Task	7594.69	1	7594.69	922.62	1.86955e-200	0.022	0.000299254	0.000298929	170
Position	780499	4	195125	23704.2	0	0.695	0.030754	0.0307527	170
Symbol	6.29984e+06	30	209995	25510.6	0	0.949	0.248233	0.248223	170
Task * Position	4.77705e+06	4	1.19426e+06	145082	0	0.933	0.18823	0.188229	170
Task * Symbol	31751.5	30	1058.38	128.575	0	0.085	0.00125111	0.00124138	170
Position * Symbol	3.47829e+06	120	28985.7	3521.25	0	0.91	0.137055	0.137016	170
Task * Position * Symbol	9.6618e+06	120	80515	9781.15	0	0.966	0.380704	0.380665	170
Residual	341943	41540	8.232						170
Source	SS	DF	MS	F	p-unc	np2	eta_sq	omega_sq	neuron_idx
Task	204446	1	204446	28257.1	0	0.405	0.00725685	0.00725659	171
Position	1.28463e+06	4	321157	44388.1	0	0.81	0.0455981	0.0455971	171
Symbol	1.27539e+07	30	425130	58758.5	0	0.977	0.452702	0.452694	171
Task * Position	2.79568e+06	4	698921	96600.1	0	0.903	0.0992334	0.0992323	171
Task * Symbol	425687	30	14189.6	1961.19	0	0.586	0.0151099	0.0151021	171
Position * Symbol	3.54867e+06	120	29572.2	4087.27	0	0.922	0.125961	0.12593	171
Task * Position * Symbol	6.85928e+06	120	57160.6	7900.36	0	0.958	0.243471	0.24344	171
Residual	300550	41540	7.235						171
Source	SS	DF	MS	F	p-unc	np2	eta_sq	omega_sq	neuron_idx
Task	804.655	1	804.655	959.234	3.08348e-208	0.023	0.000816385	0.000815533	172
Position	43399.1	4	10849.8	12934.1	0	0.555	0.0440318	0.0440283	172
Symbol	200791	30	6693.02	7978.79	0	0.852	0.203718	0.203692	172
Task * Position	94986.4	4	23746.6	28308.5	0	0.732	0.0963711	0.0963676	172
Task * Symbol	26957.4	30	898.579	1071.2	0	0.436	0.0273503	0.0273248	172
Position * Symbol	342118	120	2850.98	3398.67	0	0.908	0.347105	0.347003	172
Task * Position * Symbol	241730	120	2014.42	2401.4	0	0.874	0.245254	0.245151	172
Residual	34845.9	41540	0.839						172
Source	SS	DF	MS	F	p-unc	np2	eta_sq	omega_sq	neuron_idx
Task	8345.07	1	8345.07	929.797	5.56838e-202	0.022	0.000343093	0.000342724	174
Position	3.08177e+06	4	770442	85841.6	0	0.892	0.126701	0.1267	174
Symbol	7.60525e+06	30	253508	28245.6	0	0.953	0.312676	0.312665	174
Task * Position	2.13262e+06	4	533155	59403.4	0	0.851	0.0876788	0.0876773	174
Task * Symbol	15019.3	30	500.642	55.781	0	0.039	0.00061749	0.00060642	174
Position * Symbol	6.64734e+06	120	55394.5	6171.98	0	0.947	0.273293	0.273249	174
Task * Position * Symbol	4.45992e+06	120	37166	4140.99	0	0.923	0.183362	0.183317	174
Residual	372828	41540	8.975						174
Source	SS	DF	MS	F	p-unc	np2	eta_sq	omega_sq	neuron_idx
Task	32311.9	1	32311.9	4343.81	0	0.095	0.00145449	0.00145416	175
Position	2.98161e+06	4	745402	100207	0	0.906	0.134214	0.134213	175
Symbol	6.72993e+06	30	224331	30157.6	0	0.956	0.302942	0.302932	175
Task * Position	1.75119e+06	4	437798	58854.7	0	0.85	0.0788282	0.0788268	175
Task * Symbol	61398.4	30	2046.62	275.134	0	0.166	0.00276379	0.00275375	175
Position * Symbol	6.57855e+06	120	54821.3	7369.82	0	0.955	0.296127	0.296087	175
Task * Position * Symbol	3.77128e+06	120	31427.4	4224.89	0	0.924	0.169761	0.169721	175
Residual	309000	41540	7.439						175
Source	SS	DF	MS	F	p-unc	np2	eta_sq	omega_sq	neuron_idx
Task	197943	1	197943	20981.7	0	0.336	0.0100391	0.0100386	176
Position	1.26916e+06	4	317290	33632.3	0	0.764	0.064368	0.0643661	176
Symbol	4.68393e+06	30	156131	16549.7	0	0.923	0.237555	0.237541	176
Task * Position	4.55975e+06	4	1.13994e+06	120832	0	0.921	0.231257	0.231255	176
Task * Symbol	199559	30	6651.96	705.099	0	0.337	0.010121	0.0101067	176
Position * Symbol	1.97844e+06	120	16487	1747.6	0	0.835	0.100341	0.100283	176
Task * Position * Symbol	6.43656e+06	120	53638	5685.56	0	0.943	0.326443	0.326386	176
Residual	391892	41540	9.434						176
Source	SS	DF	MS	F	p-unc	np2	eta_sq	omega_sq	neuron_idx
Task	511.126	1	511.126	221.558	5.56731e-50	0.005	0.00034141	0.000339869	177
Position	46820.8	4	11705.2	5073.85	0	0.328	0.0312743	0.0312681	177
Symbol	510795	30	17026.5	7380.48	0	0.842	0.34119	0.341143	177
Task * Position	54239.5	4	13559.9	5877.79	0	0.361	0.0362297	0.0362235	177
Task * Symbol	16521	30	550.701	238.712	0	0.147	0.0110353	0.0109891	177
Position * Symbol	256025	120	2133.54	924.824	0	0.728	0.171014	0.170828	177
Task * Position * Symbol	516357	120	4302.98	1865.21	0	0.843	0.344905	0.344719	177
Residual	95831.4	41540	2.307						177
Source	SS	DF	MS	F	p-unc	np2	eta_sq	omega_sq	neuron_idx
Task	8676.97	1	8676.97	1453.75	0	0.034	0.00112476	0.00112398	178
Position	802995	4	200749	33633.8	0	0.764	0.104089	0.104085	178
Symbol	2.30601e+06	30	76866.9	12878.4	0	0.903	0.298917	0.298894	178
Task * Position	836470	4	209117	35035.9	0	0.771	0.108428	0.108425	178
Task * Symbol	48886.4	30	1629.55	273.017	0	0.165	0.00633693	0.00631371	178
Position * Symbol	2.02201e+06	120	16850.1	2823.09	0	0.891	0.262104	0.262011	178
Task * Position * Symbol	1.44155e+06	120	12012.9	2012.66	0	0.853	0.186861	0.186768	178
Residual	247938	41540	5.969						178
Source	SS	DF	MS	F	p-unc	np2	eta_sq	omega_sq	neuron_idx
Task	15794.6	1	15794.6	2340.93	0	0.053	0.000660957	0.000660675	179
Position	689969	4	172492	25565.3	0	0.711	0.0288732	0.028872	179
Symbol	6.63912e+06	30	221304	32799.7	0	0.959	0.277828	0.277819	179
Task * Position	4.19082e+06	4	1.0477e+06	155281	0	0.937	0.175373	0.175372	179
Task * Symbol	85872.1	30	2862.4	424.24	0	0.235	0.00359349	0.00358502	179
Position * Symbol	2.76331e+06	120	23027.6	3412.94	0	0.908	0.115636	0.115602	179
Task * Position * Symbol	9.2314e+06	120	76928.3	11401.6	0	0.971	0.386307	0.386273	179
Residual	280276	41540	6.747						179
Source	SS	DF	MS	F	p-unc	np2	eta_sq	omega_sq	neuron_idx
Task	556.287	1	556.287	81.915	1.4804e-19	0.002	3.99888e-05	3.95006e-05	180
Position	1.27789e+06	4	319471	47043.3	0	0.819	0.0918611	0.0918591	180
Symbol	2.307e+06	30	76899.9	11323.8	0	0.891	0.165839	0.165824	180
Task * Position	2.48709e+06	4	621772	91558.1	0	0.898	0.178785	0.178783	180
Task * Symbol	4801.28	30	160.043	23.567	2.64062e-128	0.017	0.000345141	0.000330496	180
Position * Symbol	2.63428e+06	120	21952.3	3232.56	0	0.903	0.189366	0.189307	180
Task * Position * Symbol	4.91735e+06	120	40977.9	6034.14	0	0.946	0.353485	0.353426	180
Residual	282099	41540	6.791						180
Source	SS	DF	MS	F	p-unc	np2	eta_sq	omega_sq	neuron_idx
Task	189059	1	189059	20092.4	0	0.326	0.00643073	0.00643041	181
Position	1.0336e+06	4	258401	27461.8	0	0.726	0.0351574	0.0351562	181
Symbol	1.27711e+07	30	425705	45242.1	0	0.97	0.434404	0.434394	181
Task * Position	3.7347e+06	4	933675	99227.2	0	0.905	0.127034	0.127033	181
Task * Symbol	327619	30	10920.6	1160.6	0	0.456	0.0111438	0.0111342	181
Position * Symbol	3.28368e+06	120	27364	2908.13	0	0.894	0.111693	0.111654	181
Task * Position * Symbol	7.66857e+06	120	63904.8	6791.54	0	0.952	0.260843	0.260804	181
Residual	390869	41540	9.409						181
Source	SS	DF	MS	F	p-unc	np2	eta_sq	omega_sq	neuron_idx
Task	1.34952e+06	1	1.34952e+06	282490	0	0.872	0.0535295	0.0535293	182
Position	8.58309e+06	4	2.14577e+06	449166	0	0.977	0.340453	0.340452	182
Symbol	544466	30	18148.9	3799.03	0	0.733	0.0215965	0.0215908	182
Task * Position	1.31914e+07	4	3.29785e+06	690326	0	0.985	0.523244	0.523243	182
Task * Symbol	68634.5	30	2287.82	478.9	0	0.257	0.00272242	0.00271674	182
Position * Symbol	673490	120	5612.41	1174.83	0	0.772	0.0267143	0.0266916	182
Task * Position * Symbol	601762	120	5014.68	1049.7	0	0.752	0.0238692	0.0238465	182
Residual	198446	41540	4.777						182
Source	SS	DF	MS	F	p-unc	np2	eta_sq	omega_sq	neuron_idx
Task	254363	1	254363	24361.3	0	0.37	0.0090063	0.00900592	183
Position	1.82637e+06	4	456593	43729.6	0	0.808	0.0646668	0.0646653	183
Symbol	6705409	30	223514	21406.7	0	0.939	0.23742	0.237409	183
Task * Position	7.37964e+06	4	1.84491e+06	176694	0	0.944	0.261293	0.261291	183
Task * Symbol	298042	30	9934.73	951.486	0	0.407	0.0105529	0.0105418	183
Position * Symbol	2.52401e+06	120	21033.4	2014.45	0	0.853	0.0893682	0.0893239	183
Task * Position * Symbol	8.82121e+06	120	73510.1	7040.34	0	0.953	0.312335	0.312291	183
Residual	433731	41540	10.441						183
Source	SS	DF	MS	F	p-unc	np2	eta_sq	omega_sq	neuron_idx
Task	501143	1	501143	104427	0	0.715	0.0300865	0.0300862	184
Position	3.7017e+06	4	925425	192839	0	0.949	0.222234	0.222233	184
Symbol	1.63451e+06	30	54483.5	11353.2	0	0.891	0.0981287	0.09812	184
Task * Position	5.54053e+06	4	1.38513e+06	288632	0	0.965	0.33263	0.332629	184
Task * Symbol	272162	30	9072.07	1890.42	0	0.577	0.0163394	0.0163308	184
Position * Symbol	1.73302e+06	120	14441.8	3009.36	0	0.897	0.104043	0.104008	184
Task * Position * Symbol	3.07434e+06	120	25619.5	5338.56	0	0.939	0.18457	0.184536	184
Residual	199349	41540	4.799						184
Source	SS	DF	MS	F	p-unc	np2	eta_sq	omega_sq	neuron_idx
Task	71749.4	1	71749.4	7945.5	0	0.161	0.00356679	0.00356634	185
Position	4.07703e+06	4	1.01926e+06	112872	0	0.916	0.202676	0.202674	185
Symbol	4.63638e+06	30	154546	17114.4	0	0.925	0.230483	0.230469	185
Task * Position	746041	4	186510	20654.1	0	0.665	0.037087	0.0370852	185
Task * Symbol	282719	30	9423.95	1043.61	0	0.43	0.0140545	0.014041	185
Position * Symbol	7.737e+06	120	64475	7139.93	0	0.954	0.38462	0.384566	185
Task * Position * Symbol	2.18991e+06	120	18249.3	2020.92	0	0.854	0.108865	0.108811	185
Residual	375114	41540	9.03						185
Source	SS	DF	MS	F	p-unc	np2	eta_sq	omega_sq	neuron_idx
Task	47437	1	47437	8786.05	0	0.175	0.00193808	0.00193786	186
Position	5.80459e+06	4	1.45115e+06	268775	0	0.963	0.237152	0.237151	186
Symbol	5.66666e+06	30	188889	34985	0	0.962	0.231517	0.23151	186
Task * Position	1.33298e+06	4	333246	61722.2	0	0.856	0.0544603	0.0544594	186
Task * Symbol	110220	30	3673.99	680.478	0	0.33	0.00450312	0.00449651	186
Position * Symbol	8.547e+06	120	71225	13192	0	0.974	0.349196	0.349169	186
Task * Position * Symbol	2.74307e+06	120	22858.9	4233.82	0	0.924	0.112071	0.112044	186
Residual	224280	41540	5.399						186
Source	SS	DF	MS	F	p-unc	np2	eta_sq	omega_sq	neuron_idx
Task	195.998	1	195.998	15.851	6.86301e-05	0	7.02225e-06	6.57923e-06	187
Position	4.50277e+06	4	1.12569e+06	91041.3	0	0.898	0.161326	0.161324	187
Symbol	7.41343e+06	30	247114	19985.6	0	0.935	0.26561	0.265596	187
Task * Position	2.96694e+06	4	741735	59988.4	0	0.852	0.1063	0.106298	187
Task * Symbol	31094.6	30	1036.49	83.827	0	0.057	0.00111406	0.00110077	187
Position * Symbol	7.6068e+06	120	63390	5126.72	0	0.937	0.272538	0.272484	187
Task * Position * Symbol	4.87614e+06	120	40634.5	3286.35	0	0.905	0.174703	0.17465	187
Residual	513627	41540	12.365						187
Source	SS	DF	MS	F	p-unc	np2	eta_sq	omega_sq	neuron_idx
Task	17522.7	1	17522.7	3168.7	0	0.071	0.000777302	0.000777056	188
Position	3.84494e+06	4	961236	173824	0	0.944	0.17056	0.170559	188
Symbol	2.50013e+06	30	83337.7	15070.3	0	0.916	0.110905	0.110897	188
Task * Position	6.65377e+06	4	1.66344e+06	300806	0	0.967	0.295159	0.295157	188
Task * Symbol	24758.3	30	825.277	149.238	0	0.097	0.00109827	0.00109091	188
Position * Symbol	3.43241e+06	120	28603.4	5172.45	0	0.937	0.15226	0.152231	188
Task * Position * Symbol	5.83979e+06	120	48664.9	8800.25	0	0.962	0.259051	0.259021	188
Residual	229714	41540	5.53						188
Source	SS	DF	MS	F	p-unc	np2	eta_sq	omega_sq	neuron_idx
Task	1.77439e+06	1	1.77439e+06	240553	0	0.853	0.0525318	0.0525316	189
Position	1.78442e+07	4	4.46106e+06	604782	0	0.983	0.528287	0.528286	189
Symbol	461572	30	15385.7	2085.83	0	0.601	0.0136651	0.0136585	189
Task * Position	1.24866e+07	4	3.12166e+06	423200	0	0.976	0.369673	0.369672	189
Task * Symbol	7397.75	30	246.592	33.43	3.47666e-189	0.024	0.000219014	0.000212463	189
Position * Symbol	390260	120	3252.17	440.894	0	0.56	0.0115538	0.0115276	189
Task * Position * Symbol	506633	120	4221.94	572.365	0	0.623	0.0149991	0.0149729	189
Residual	306412	41540	7.376						189
Source	SS	DF	MS	F	p-unc	np2	eta_sq	omega_sq	neuron_idx
Task	8296.03	1	8296.03	1081.54	3.48377e-234	0.025	0.000294146	0.000293874	190
Position	1.05359e+06	4	263397	34338.6	0	0.768	0.0373562	0.0373551	190
Symbol	7.51744e+06	30	250581	32667.9	0	0.959	0.26654	0.266532	190
Task * Position	5.82671e+06	4	1.45668e+06	189905	0	0.948	0.206593	0.206592	190
Task * Symbol	16679.9	30	555.997	72.484	0	0.05	0.000591407	0.000583247	190
Position * Symbol	3.29289e+06	120	27440.7	3577.41	0	0.912	0.116753	0.116721	190
Task * Position * Symbol	1.01695e+07	120	84746.2	11048.2	0	0.97	0.360574	0.360541	190
Residual	318636	41540	7.671						190
Source	SS	DF	MS	F	p-unc	np2	eta_sq	omega_sq	neuron_idx
Task	16771.3	1	16771.3	2269.32	0	0.052	0.000591305	0.000591044	191
Position	4.53435e+06	4	1.13359e+06	153385	0	0.937	0.159867	0.159866	191
Symbol	8.47677e+06	30	282559	38232.9	0	0.965	0.298865	0.298857	191
Task * Position	2.91424e+06	4	728561	98581.3	0	0.905	0.102747	0.102746	191
Task * Symbol	31745.3	30	1058.18	143.181	0	0.094	0.00111924	0.00111143	191
Position * Symbol	7.44751e+06	120	62062.6	8397.67	0	0.96	0.262577	0.262545	191
Task * Position * Symbol	4.63481e+06	120	38623.4	5226.12	0	0.938	0.163409	0.163378	191
Residual	307000	41540	7.39						191
Source	SS	DF	MS	F	p-unc	np2	eta_sq	omega_sq	neuron_idx
Task	196.134	1	196.134	43.082	5.31029e-11	0.001	2.01902e-05	1.97215e-05	192
Position	180683	4	45170.9	9922.08	0	0.489	0.0185997	0.0185978	192
Symbol	7.2324e+06	30	241080	52954.8	0	0.975	0.74451	0.744495	192
Task * Position	49054.9	4	12263.7	2693.81	0	0.206	0.00504976	0.00504788	192
Task * Symbol	10844.4	30	361.479	79.401	0	0.054	0.00111633	0.00110227	192
Position * Symbol	1.31306e+06	120	10942.2	2403.52	0	0.874	0.135168	0.135111	192
Task * Position * Symbol	738960	120	6158	1352.65	0	0.796	0.0760692	0.076013	192
Residual	189113	41540	4.553						192
Source	SS	DF	MS	F	p-unc	np2	eta_sq	omega_sq	neuron_idx
Task	2812.44	1	2812.44	283.991	1.64942e-63	0.007	0.000111276	0.000110884	193
Position	4.60832e+06	4	1.15208e+06	116333	0	0.918	0.18233	0.182329	193
Symbol	7.0557e+06	30	235190	23748.6	0	0.945	0.279163	0.279151	193
Task * Position	1.78629e+06	4	446573	45093.3	0	0.813	0.0706756	0.070674	193
Task * Symbol	12986.9	30	432.897	43.712	9.06443e-253	0.031	0.000513834	0.00050208	193
Position * Symbol	7.61353e+06	120	63446.1	6406.56	0	0.949	0.301233	0.301186	193
Task * Position * Symbol	3.78351e+06	120	31529.2	3183.71	0	0.902	0.149696	0.149649	193
Residual	411383	41540	9.903						193
Source	SS	DF	MS	F	p-unc	np2	eta_sq	omega_sq	neuron_idx
Task	9698	1	9698	1048.63	3.28149e-227	0.025	0.000291491	0.000291213	194
Position	1.5735e+06	4	393375	42535	0	0.804	0.0472944	0.0472933	194
Symbol	7.446e+06	30	248200	26837.5	0	0.951	0.223803	0.223795	194
Task * Position	9.09254e+06	4	2.27313e+06	245791	0	0.959	0.273293	0.273292	194
Task * Symbol	17931.7	30	597.725	64.631	0	0.045	0.000538971	0.000530632	194
Position * Symbol	3.71646e+06	120	30970.5	3348.8	0	0.906	0.111705	0.111672	194
Task * Position * Symbol	1.103e+07	120	91916.8	9938.83	0	0.966	0.331527	0.331494	194
Residual	384172	41540	9.248						194
Source	SS	DF	MS	F	p-unc	np2	eta_sq	omega_sq	neuron_idx
Task	174302	1	174302	18206.2	0	0.305	0.00789306	0.00789262	195
Position	1.48502e+06	4	371254	38778.2	0	0.789	0.0672473	0.0672455	195
Symbol	4.83566e+06	30	161189	16836.5	0	0.924	0.218977	0.218964	195
Task * Position	4.76369e+06	4	1.19092e+06	124394	0	0.923	0.215718	0.215717	195
Task * Symbol	274403	30	9146.76	955.399	0	0.408	0.012426	0.012413	195
Position * Symbol	2.8151e+06	120	23459.2	2450.36	0	0.876	0.127479	0.127427	195
Task * Position * Symbol	7.33705e+06	120	61142.1	6386.42	0	0.949	0.33225	0.332198	195
Residual	397694	41540	9.574						195
Source	SS	DF	MS	F	p-unc	np2	eta_sq	omega_sq	neuron_idx
Task	10296.2	1	10296.2	973.331	3.12216e-211	0.023	0.00029303	0.000292729	196
Position	1.90102e+06	4	475255	44927.4	0	0.812	0.0541033	0.054102	196
Symbol	7.95747e+06	30	265249	25074.9	0	0.948	0.226471	0.226461	196
Task * Position	1.04715e+07	4	2.61787e+06	247476	0	0.96	0.298019	0.298018	196
Task * Symbol	33360.1	30	1112.01	105.121	0	0.071	0.000949434	0.000940402	196
Position * Symbol	3.23578e+06	120	26964.8	2549.07	0	0.88	0.0920906	0.0920545	196
Task * Position * Symbol	1.10881e+07	120	92400.5	8734.93	0	0.962	0.315568	0.315531	196
Residual	439422	41540	10.578						196
Source	SS	DF	MS	F	p-unc	np2	eta_sq	omega_sq	neuron_idx
Task	15281.6	1	15281.6	3017.89	0	0.068	0.000763161	0.000762908	197
Position	2.97105e+06	4	742762	146685	0	0.934	0.148374	0.148373	197
Symbol	2.5068e+06	30	83559.9	16501.9	0	0.923	0.125189	0.125182	197
Task * Position	5.06736e+06	4	1.26684e+06	250183	0	0.96	0.253064	0.253063	197
Task * Symbol	29993.2	30	999.772	197.441	0	0.125	0.00149786	0.00149027	197
Position * Symbol	3.44039e+06	120	28669.9	5661.9	0	0.942	0.171813	0.171782	197
Task * Position * Symbol	5.78284e+06	120	48190.3	9516.9	0	0.965	0.288795	0.288764	197
Residual	210344	41540	5.064						197
Source	SS	DF	MS	F	p-unc	np2	eta_sq	omega_sq	neuron_idx
Task	238643	1	238643	19979.3	0	0.325	0.0069312	0.00693085	198
Position	3.35469e+06	4	838673	70214	0	0.871	0.0974344	0.097433	198
Symbol	1.25193e+07	30	417312	34937.5	0	0.962	0.363615	0.363604	198
Task * Position	4.43311e+06	4	1.10828e+06	92785.4	0	0.899	0.128756	0.128755	198
Task * Symbol	418171	30	13939	1166.98	0	0.457	0.0121455	0.012135	198
Position * Symbol	6.10922e+06	120	50910.2	4262.22	0	0.925	0.177438	0.177396	198
Task * Position * Symbol	6.86088e+06	120	57174	4786.63	0	0.933	0.199269	0.199227	198
Residual	496175	41540	11.945						198
Source	SS	DF	MS	F	p-unc	np2	eta_sq	omega_sq	neuron_idx
Task	113635	1	113635	13576.2	0	0.246	0.00363583	0.00363556	199
Position	1.53593e+06	4	383983	45875.3	0	0.815	0.0491432	0.0491422	199
Symbol	8.13824e+06	30	271275	32409.8	0	0.959	0.260389	0.260381	199
Task * Position	8.26023e+06	4	2.06506e+06	246717	0	0.96	0.264292	0.264291	199
Task * Symbol	135288	30	4509.61	538.773	0	0.28	0.00432865	0.00432061	199
Position * Symbol	2.41221e+06	120	20101.8	2401.61	0	0.874	0.0771806	0.0771484	199
Task * Position * Symbol	1.03109e+07	120	85924.3	10265.6	0	0.967	0.329906	0.329873	199
Residual	347696	41540	8.37						199
Source	SS	DF	MS	F	p-unc	np2	eta_sq	omega_sq	neuron_idx
Task	6.387	1	6.387	0.535	0.464463	0	2.07494e-07	-1.80238e-07	200
Position	4.62765e+06	4	1.15691e+06	96933.2	0	0.903	0.150339	0.150337	200
Symbol	7.76609e+06	30	258870	21689.7	0	0.94	0.252297	0.252285	200
Task * Position	4.74342e+06	4	1.18585e+06	99358.1	0	0.905	0.154099	0.154098	200
Task * Symbol	19439.1	30	647.971	54.291	0	0.038	0.000631519	0.000619887	200
Position * Symbol	7.77524e+06	120	64793.7	5428.81	0	0.94	0.252594	0.252548	200
Task * Position * Symbol	5.35391e+06	120	44615.9	3738.19	0	0.915	0.173932	0.173886	200
Residual	495787	41540	11.935						200
Source	SS	DF	MS	F	p-unc	np2	eta_sq	omega_sq	neuron_idx
Task	1693.26	1	1693.26	220.616	8.9102e-50	0.005	8.46651e-05	8.42813e-05	201
Position	2.22678e+06	4	556695	72532.4	0	0.875	0.111342	0.11134	201
Symbol	3.33171e+06	30	111057	14469.8	0	0.913	0.16659	0.166579	201
Task * Position	4.86426e+06	4	1.21606e+06	158442	0	0.938	0.24322	0.243218	201
Task * Symbol	97081	30	3236.03	421.626	0	0.233	0.00485418	0.00484267	201
Position * Symbol	3.15003e+06	120	26250.2	3420.17	0	0.908	0.157506	0.157459	201
Task * Position * Symbol	6.00908e+06	120	50075.6	6524.41	0	0.95	0.300462	0.300416	201
Residual	318824	41540	7.675						201
Source	SS	DF	MS	F	p-unc	np2	eta_sq	omega_sq	neuron_idx
Task	22001.4	1	22001.4	2313.32	0	0.053	0.000813672	0.00081332	202
Position	3.70154e+06	4	925386	97299.2	0	0.904	0.136893	0.136892	202
Symbol	7.09926e+06	30	236642	24881.6	0	0.947	0.26255	0.262539	202
Task * Position	4.0509e+06	4	1.01273e+06	106483	0	0.911	0.149813	0.149812	202
Task * Symbol	33900.3	30	1130.01	118.814	0	0.079	0.00125372	0.00124317	202
Position * Symbol	6.91574e+06	120	57631.2	6059.6	0	0.946	0.255763	0.255721	202
Task * Position * Symbol	4.82122e+06	120	40176.8	4224.37	0	0.924	0.178302	0.17826	202
Residual	395075	41540	9.511						202
Source	SS	DF	MS	F	p-unc	np2	eta_sq	omega_sq	neuron_idx
Task	9221.65	1	9221.65	1367.07	1.84202e-294	0.032	0.00038187	0.000381591	203
Position	4.30989e+06	4	1.07747e+06	159731	0	0.939	0.178474	0.178472	203
Symbol	2.59805e+06	30	86601.8	12838.4	0	0.903	0.107586	0.107578	203
Task * Position	7.50079e+06	4	1.8752e+06	277990	0	0.964	0.31061	0.310608	203
Task * Symbol	20361.8	30	678.725	100.618	0	0.068	0.000843184	0.000834804	203
Position * Symbol	3.47977e+06	120	28998	4298.84	0	0.925	0.144098	0.144064	203
Task * Position * Symbol	5.95033e+06	120	49586.1	7350.93	0	0.955	0.246404	0.246371	203
Residual	280210	41540	6.746						203
Source	SS	DF	MS	F	p-unc	np2	eta_sq	omega_sq	neuron_idx
Task	211328	1	211328	22643.9	0	0.353	0.00912765	0.00912724	204
Position	1.92067e+06	4	480168	51450.2	0	0.832	0.0829574	0.0829557	204
Symbol	6.20034e+06	30	206678	22145.6	0	0.941	0.267804	0.267792	204
Task * Position	4.97899e+06	4	1.24475e+06	133375	0	0.928	0.215052	0.21505	204
Task * Symbol	229456	30	7648.52	819.543	0	0.372	0.00991061	0.00989851	204
Position * Symbol	2.32845e+06	120	19403.7	2079.12	0	0.857	0.10057	0.100521	204
Task * Position * Symbol	6.89562e+06	120	57463.5	6157.24	0	0.947	0.297834	0.297786	204
Residual	387679	41540	9.333						204
Source	SS	DF	MS	F	p-unc	np2	eta_sq	omega_sq	neuron_idx
Task	9591.43	1	9591.43	1396.9	9.81229e-301	0.033	0.000709112	0.000708604	206
Position	3.76387e+06	4	940968	137043	0	0.93	0.27827	0.278268	206
Symbol	2.19347e+06	30	73115.7	10648.6	0	0.885	0.162167	0.162152	206
Task * Position	9583.98	4	2395.99	348.954	5.16968e-296	0.033	0.000708562	0.000706531	206
Task * Symbol	22346.5	30	744.884	108.485	0	0.073	0.00165212	0.00163689	206
Position * Symbol	7.18406e+06	120	59867.1	8719.08	0	0.962	0.531131	0.531069	206
Task * Position * Symbol	57824	120	481.867	70.179	0	0.169	0.00427504	0.00421412	206
Residual	285223	41540	6.866						206
Source	SS	DF	MS	F	p-unc	np2	eta_sq	omega_sq	neuron_idx
Task	10466.5	1	10466.5	1623.95	0	0.038	0.000447709	0.000447433	207
Position	3.37757e+06	4	844393	131013	0	0.927	0.144477	0.144476	207
Symbol	7.12122e+06	30	237374	36830.1	0	0.964	0.304613	0.304605	207
Task * Position	1.548e+06	4	386999	60045.5	0	0.853	0.0662162	0.0662151	207
Task * Symbol	22597.8	30	753.259	116.873	0	0.078	0.000966628	0.000958358	207
Position * Symbol	7.06277e+06	120	58856.4	9131.97	0	0.963	0.302113	0.30208	207
Task * Position * Symbol	3.96757e+06	120	33063	5129.95	0	0.937	0.169714	0.169681	207
Residual	267729	41540	6.445						207
Source	SS	DF	MS	F	p-unc	np2	eta_sq	omega_sq	neuron_idx
Task	18934.8	1	18934.8	3369.47	0	0.075	0.000917296	0.000917024	208
Position	2.94177e+06	4	735443	130873	0	0.926	0.142514	0.142513	208
Symbol	2.59817e+06	30	86605.7	15411.6	0	0.918	0.125868	0.12586	208
Task * Position	5.16446e+06	4	1.29111e+06	229755	0	0.957	0.250192	0.250191	208
Task * Symbol	17364.6	30	578.821	103.002	0	0.069	0.000841228	0.00083306	208
Position * Symbol	3.58248e+06	120	29854	5312.56	0	0.939	0.173553	0.17352	208
Task * Position * Symbol	6.08538e+06	120	50711.5	9024.17	0	0.963	0.294806	0.294773	208
Residual	233435	41540	5.62						208
Source	SS	DF	MS	F	p-unc	np2	eta_sq	omega_sq	neuron_idx
Task	6343.17	1	6343.17	1070.36	8.12378e-232	0.025	0.000419703	0.000419311	209
Position	4.49698e+06	4	1.12425e+06	189708	0	0.948	0.297548	0.297546	209
Symbol	2.40834e+06	30	80278	13546.3	0	0.907	0.159351	0.159339	209
Task * Position	7930.61	4	1982.65	334.558	6.33459e-284	0.031	0.000524738	0.000523169	209
Task * Symbol	12603.5	30	420.115	70.891	0	0.049	0.000833922	0.000822158	209
Position * Symbol	7.87384e+06	120	65615.3	11072.1	0	0.97	0.520981	0.520934	209
Task * Position * Symbol	61259.3	120	510.494	86.142	0	0.199	0.00405329	0.00400624	209
Residual	246174	41540	5.926						209
Source	SS	DF	MS	F	p-unc	np2	eta_sq	omega_sq	neuron_idx
Task	1276.15	1	1276.15	137.197	1.22457e-31	0.003	4.12113e-05	4.09109e-05	210
Position	4.76369e+06	4	1.19092e+06	128034	0	0.925	0.153836	0.153835	210
Symbol	8.85521e+06	30	295174	31733.7	0	0.958	0.285965	0.285956	210
Task * Position	4.03461e+06	4	1.00865e+06	108439	0	0.913	0.130292	0.13029	210
Task * Symbol	8580.48	30	286.016	30.749	1.30396e-172	0.022	0.000277093	0.000268081	210
Position * Symbol	7.67332e+06	120	63944.3	6874.56	0	0.952	0.247798	0.247762	210
Task * Position * Symbol	5.24295e+06	120	43691.3	4697.19	0	0.931	0.169313	0.169277	210
Residual	386388	41540	9.302						210
Source	SS	DF	MS	F	p-unc	np2	eta_sq	omega_sq	neuron_idx
Task	514.669	1	514.669	58.454	2.12594e-14	0.001	2.22197e-05	2.18396e-05	211
Position	2.50961e+06	4	627404	71257.7	0	0.873	0.108347	0.108346	211
Symbol	7.00937e+06	30	233646	26536.4	0	0.95	0.302614	0.302603	211
Task * Position	2.19472e+06	4	548680	62316.6	0	0.857	0.0947523	0.0947507	211
Task * Symbol	12082.7	30	402.758	45.743	2.55595e-265	0.032	0.000521646	0.000510242	211
Position * Symbol	6.64523e+06	120	55376.9	6289.46	0	0.948	0.286893	0.286848	211
Task * Position * Symbol	4.42543e+06	120	36878.6	4188.51	0	0.924	0.191059	0.191013	211
Residual	365748	41540	8.805						211
Source	SS	DF	MS	F	p-unc	np2	eta_sq	omega_sq	neuron_idx
Task	39618.6	1	39618.6	23354.1	0	0.36	0.01002	0.0100196	212
Position	460208	4	115052	67820	0	0.867	0.116392	0.11639	212
Symbol	768811	30	25627	15106.4	0	0.916	0.194441	0.194428	212
Task * Position	627174	4	156793	92425.5	0	0.899	0.15862	0.158618	212
Task * Symbol	72896.3	30	2429.88	1432.35	0	0.508	0.0184364	0.0184235	212
Position * Symbol	807216	120	6726.8	3965.26	0	0.92	0.204155	0.204103	212
Task * Position * Symbol	1.10755e+06	120	9229.59	5440.59	0	0.94	0.280113	0.280061	212
Residual	70469.8	41540	1.696						212
Source	SS	DF	MS	F	p-unc	np2	eta_sq	omega_sq	neuron_idx
Task	1730.88	1	1730.88	142.307	9.42365e-33	0.003	6.999e-05	6.94982e-05	213
Position	4.37748e+06	4	1.09437e+06	89975.8	0	0.897	0.177009	0.177007	213
Symbol	6.62797e+06	30	220932	18164.4	0	0.929	0.26801	0.267995	213
Task * Position	1.43187e+06	4	357968	29431	0	0.739	0.0578994	0.0578974	213
Task * Symbol	10631	30	354.365	29.135	1.22719e-162	0.021	0.000429876	0.000415121	213
Position * Symbol	7.89205e+06	120	65767.1	5407.17	0	0.94	0.319125	0.319065	213
Task * Position * Symbol	3.88332e+06	120	32361	2660.63	0	0.885	0.157027	0.156968	213
Residual	505248	41540	12.163						213
Source	SS	DF	MS	F	p-unc	np2	eta_sq	omega_sq	neuron_idx
Task	4814.77	1	4814.77	3980.09	0	0.087	0.00526672	0.00526539	214
Position	12359.4	4	3089.84	2554.19	0	0.197	0.0135195	0.0135142	214
Symbol	236991	30	7899.69	6530.22	0	0.825	0.259237	0.259196	214
Task * Position	67254.8	4	16813.7	13898.9	0	0.572	0.0735678	0.0735624	214
Task * Symbol	8602.63	30	286.754	237.043	0	0.146	0.00941014	0.00937042	214
Position * Symbol	165319	120	1377.66	1138.83	0	0.767	0.180838	0.180679	214
Task * Position * Symbol	368594	120	3071.62	2539.13	0	0.88	0.403193	0.403034	214
Residual	50251.5	41540	1.21						214
Source	SS	DF	MS	F	p-unc	np2	eta_sq	omega_sq	neuron_idx
Task	1.02517e+06	1	1.02517e+06	67763.2	0	0.62	0.0329806	0.0329801	215
Position	4.84859e+06	4	1.21215e+06	80122.5	0	0.885	0.155983	0.155981	215
Symbol	1.03083e+06	30	34360.9	2271.24	0	0.621	0.0331626	0.033148	215
Task * Position	2.06964e+07	4	5.1741e+06	342007	0	0.971	0.665822	0.66582	215
Task * Symbol	107809	30	3593.64	237.539	0	0.146	0.00346832	0.00345372	215
Position * Symbol	894861	120	7457.18	492.917	0	0.587	0.0287885	0.0287301	215
Task * Position * Symbol	1.85188e+06	120	15432.3	1020.07	0	0.747	0.0595766	0.0595182	215
Residual	628445	41540	15.129						215
Source	SS	DF	MS	F	p-unc	np2	eta_sq	omega_sq	neuron_idx
Task	280.465	1	280.465	121.134	3.90557e-28	0.003	0.000180739	0.000179247	216
Position	116130	4	29032.6	12539.3	0	0.547	0.0748374	0.0748313	216
Symbol	292358	30	9745.27	4209.03	0	0.752	0.188403	0.188358	216
Task * Position	12109	4	3027.24	1307.48	0	0.112	0.00780334	0.00779736	216
Task * Symbol	35257.7	30	1175.26	507.599	0	0.268	0.022721	0.0226762	216
Position * Symbol	455778	120	3798.15	1640.44	0	0.826	0.293716	0.293536	216
Task * Position * Symbol	543675	120	4530.63	1956.8	0	0.85	0.350359	0.350179	216
Residual	96178.5	41540	2.315						216
Source	SS	DF	MS	F	p-unc	np2	eta_sq	omega_sq	neuron_idx
Task	172917	1	172917	8999.38	0	0.178	0.00349214	0.00349175	217
Position	2.9352e+06	4	733800	38190.3	0	0.786	0.0592778	0.0592762	217
Symbol	3.08894e+07	30	1.02965e+06	53587.5	0	0.975	0.623826	0.623814	217
Task * Position	1.71365e+06	4	428413	22296.6	0	0.682	0.034608	0.0346064	217
Task * Symbol	407714	30	13590.5	707.31	0	0.338	0.00823397	0.00822233	217
Position * Symbol	6.40839e+06	120	53403.3	2779.35	0	0.889	0.129421	0.129374	217
Task * Position * Symbol	6.19059e+06	120	51588.2	2684.89	0	0.886	0.125022	0.124975	217
Residual	798162	41540	19.214						217
Source	SS	DF	MS	F	p-unc	np2	eta_sq	omega_sq	neuron_idx
Task	10280.3	1	10280.3	1345.92	5.20169e-290	0.031	0.000384407	0.000384122	218
Position	920068	4	230017	30114.3	0	0.744	0.0344038	0.0344026	218
Symbol	7.03603e+06	30	234534	30705.7	0	0.957	0.263096	0.263087	218
Task * Position	5.22036e+06	4	1.30509e+06	170865	0	0.943	0.195203	0.195202	218
Task * Symbol	12573.6	30	419.121	54.872	0	0.038	0.000470161	0.000461592	218
Position * Symbol	3.18048e+06	120	26504	3469.97	0	0.909	0.118927	0.118892	218
Task * Position * Symbol	1.00462e+07	120	83718	10960.5	0	0.969	0.375652	0.375618	218
Residual	317288	41540	7.638						218
Source	SS	DF	MS	F	p-unc	np2	eta_sq	omega_sq	neuron_idx
Task	270.728	1	270.728	38.768	4.81731e-10	0.001	1.53717e-05	1.49752e-05	219
Position	2.13421e+06	4	533552	76405.2	0	0.88	0.121179	0.121177	219
Symbol	2.60587e+06	30	86862.3	12438.8	0	0.9	0.147959	0.147947	219
Task * Position	4.14069e+06	4	1.03517e+06	148238	0	0.935	0.235105	0.235103	219
Task * Symbol	10251	30	341.701	48.932	5.23669e-285	0.034	0.000582045	0.00057015	219
Position * Symbol	2.9423e+06	120	24519.2	3511.17	0	0.91	0.167062	0.167014	219
Task * Position * Symbol	5.4884e+06	120	45736.6	6549.53	0	0.95	0.311627	0.311579	219
Residual	290082	41540	6.983						219
Source	SS	DF	MS	F	p-unc	np2	eta_sq	omega_sq	neuron_idx
Task	27084	1	27084	3299.19	0	0.074	0.00113469	0.00113434	220
Position	2.95675e+06	4	739189	90042.8	0	0.897	0.123873	0.123872	220
Symbol	6.33635e+06	30	211212	25728.3	0	0.949	0.265462	0.265451	220
Task * Position	2.28151e+06	4	570378	69479.5	0	0.87	0.0955841	0.0955827	220
Task * Symbol	45656.7	30	1521.89	185.386	0	0.118	0.00191279	0.00190247	220
Position * Symbol	7.38571e+06	120	61547.5	7497.3	0	0.956	0.309425	0.309383	220
Task * Position * Symbol	4.49509e+06	120	37459.1	4563.01	0	0.929	0.188322	0.188281	220
Residual	341014	41540	8.209						220
Source	SS	DF	MS	F	p-unc	np2	eta_sq	omega_sq	neuron_idx
Task	4510.4	1	4510.4	576.696	1.43588e-126	0.014	0.000228331	0.000227935	221
Position	512175	4	128044	16371.6	0	0.612	0.025928	0.0259264	221
Symbol	5.00867e+06	30	166956	21346.8	0	0.939	0.253555	0.253543	221
Task * Position	2.94109e+06	4	735273	94011.5	0	0.901	0.148888	0.148886	221
Task * Symbol	10228.1	30	340.935	43.592	5.05173e-252	0.031	0.000517777	0.0005059	221
Position * Symbol	3.02002e+06	120	25166.8	3217.81	0	0.903	0.152883	0.152836	221
Task * Position * Symbol	7.93218e+06	120	66101.5	8451.68	0	0.961	0.401553	0.401505	221
Residual	324889	41540	7.821						221
Source	SS	DF	MS	F	p-unc	np2	eta_sq	omega_sq	neuron_idx
Task	341459	1	341459	30154.2	0	0.421	0.00991188	0.00991154	222
Position	3.137e+06	4	784251	69257.2	0	0.87	0.091061	0.0910597	222
Symbol	1.31132e+07	30	437106	38600.8	0	0.965	0.38065	0.38064	222
Task * Position	4.40801e+06	4	1.102e+06	97317.9	0	0.904	0.127956	0.127954	222
Task * Symbol	532802	30	17760.1	1568.39	0	0.531	0.0154662	0.0154563	222
Position * Symbol	5.36509e+06	120	44709.1	3948.27	0	0.919	0.155738	0.155699	222
Task * Position * Symbol	7.08153e+06	120	59012.8	5211.42	0	0.938	0.205563	0.205523	222
Residual	470388	41540	11.324						222
Source	SS	DF	MS	F	p-unc	np2	eta_sq	omega_sq	neuron_idx
Task	2417.28	1	2417.28	238.901	9.64095e-54	0.006	0.000107703	0.000107252	223
Position	2.24482e+06	4	561204	55464.1	0	0.842	0.100018	0.100016	223
Symbol	4.93518e+06	30	164506	16258.2	0	0.922	0.219888	0.219874	223
Task * Position	5.00719e+06	4	1.2518e+06	123716	0	0.923	0.223096	0.223094	223
Task * Symbol	10223.6	30	340.786	33.68	9.91884e-191	0.024	0.000455513	0.000441989	223
Position * Symbol	4.22081e+06	120	35173.4	3476.2	0	0.909	0.188059	0.188005	223
Task * Position * Symbol	5.60311e+06	120	46692.6	4614.65	0	0.93	0.249648	0.249594	223
Residual	420316	41540	10.118						223
Source	SS	DF	MS	F	p-unc	np2	eta_sq	omega_sq	neuron_idx
Task	143741	1	143741	35902.5	0	0.464	0.0117987	0.0117983	224
Position	1.45326e+06	4	363316	90746.3	0	0.897	0.119288	0.119287	224
Symbol	2.78589e+06	30	92863	23194.6	0	0.944	0.228674	0.228664	224
Task * Position	1.95328e+06	4	488319	121969	0	0.922	0.160331	0.160329	224
Task * Symbol	172998	30	5766.59	1440.34	0	0.51	0.0142002	0.0141903	224
Position * Symbol	2.21256e+06	120	18438	4605.32	0	0.93	0.181614	0.181574	224
Task * Position * Symbol	3.29476e+06	120	27456.4	6857.85	0	0.952	0.270444	0.270404	224
Residual	166311	41540	4.004						224
Source	SS	DF	MS	F	p-unc	np2	eta_sq	omega_sq	neuron_idx
Task	333852	1	333852	37136.3	0	0.472	0.0107299	0.0107296	225
Position	1.49862e+06	4	374655	41675.1	0	0.801	0.0481651	0.0481639	225
Symbol	1.23126e+07	30	410421	45653.5	0	0.971	0.395723	0.395714	225
Task * Position	4.3854e+06	4	1.09635e+06	121953	0	0.922	0.140945	0.140944	225
Task * Symbol	505188	30	16839.6	1873.16	0	0.575	0.0162365	0.0162278	225
Position * Symbol	4.47463e+06	120	37288.6	4147.83	0	0.923	0.143813	0.143778	225
Task * Position * Symbol	7.23052e+06	120	60254.3	6702.44	0	0.951	0.232386	0.232351	225
Residual	373441	41540	8.99						225
Source	SS	DF	MS	F	p-unc	np2	eta_sq	omega_sq	neuron_idx
Task	8033.66	1	8033.66	1130.02	1.89724e-244	0.026	0.000317104	0.000316824	226
Position	4.84214e+06	4	1.21053e+06	170275	0	0.943	0.191129	0.191127	226
Symbol	2.51131e+06	30	83710.5	11774.8	0	0.895	0.0991264	0.099118	226
Task * Position	8.45944e+06	4	2.11486e+06	297478	0	0.966	0.33391	0.333909	226
Task * Symbol	18139.4	30	604.647	85.05	0	0.058	0.000715998	0.00070758	226
Position * Symbol	3.38547e+06	120	28212.3	3968.36	0	0.92	0.133631	0.133598	226
Task * Position * Symbol	5.81459e+06	120	48454.9	6815.7	0	0.952	0.229513	0.229479	226
Residual	295321	41540	7.109						226
Source	SS	DF	MS	F	p-unc	np2	eta_sq	omega_sq	neuron_idx
Task	23563.9	1	23563.9	2557.69	0	0.058	0.00085479	0.000854455	228
Position	3.86279e+06	4	965698	104820	0	0.91	0.140124	0.140123	228
Symbol	8.0261e+06	30	267537	29039.2	0	0.954	0.29115	0.29114	228
Task * Position	3.24542e+06	4	811354	88066.7	0	0.895	0.117729	0.117728	228
Task * Symbol	41859.5	30	1395.32	151.452	0	0.099	0.00151847	0.00150844	228
Position * Symbol	7.17877e+06	120	59823.1	6493.37	0	0.949	0.260413	0.260373	228
Task * Position * Symbol	4.80566e+06	120	40047.2	4346.84	0	0.926	0.174327	0.174287	228
Residual	382706	41540	9.213						228
Source	SS	DF	MS	F	p-unc	np2	eta_sq	omega_sq	neuron_idx
Task	309759	1	309759	231721	0	0.848	0.0467952	0.046795	229
Position	1.3736e+06	4	343400	256887	0	0.961	0.20751	0.207509	229
Symbol	490603	30	16353.4	12233.5	0	0.898	0.0741152	0.0741091	229
Task * Position	1.53492e+06	4	383729	287056	0	0.965	0.231879	0.231879	229
Task * Symbol	214330	30	7144.32	5344.44	0	0.794	0.0323787	0.0323726	229
Position * Symbol	1.18539e+06	120	9878.23	7389.59	0	0.955	0.179076	0.179052	229
Task * Position * Symbol	1.45533e+06	120	12127.8	9072.41	0	0.963	0.219857	0.219833	229
Residual	55529.7	41540	1.337						229
Source	SS	DF	MS	F	p-unc	np2	eta_sq	omega_sq	neuron_idx
Task	219724	1	219724	28074.8	0	0.403	0.0101896	0.0101893	230
Position	1.06538e+06	4	266346	34031.8	0	0.766	0.0494068	0.0494053	230
Symbol	5.66381e+06	30	188794	24122.7	0	0.946	0.262657	0.262646	230
Task * Position	4.19804e+06	4	1.04951e+06	134099	0	0.928	0.194682	0.194681	230
Task * Symbol	338891	30	11296.4	1443.37	0	0.51	0.015716	0.0157051	230
Position * Symbol	2.24503e+06	120	18708.6	2390.45	0	0.874	0.104112	0.104069	230
Task * Position * Symbol	7.50754e+06	120	62562.9	7993.83	0	0.958	0.348159	0.348116	230
Residual	325108	41540	7.826						230
Source	SS	DF	MS	F	p-unc	np2	eta_sq	omega_sq	neuron_idx
Task	44167.2	1	44167.2	17040.2	0	0.291	0.00608016	0.0060798	231
Position	730826	4	182706	70490	0	0.872	0.100607	0.100606	231
Symbol	1.18633e+06	30	39544.3	15256.6	0	0.917	0.163313	0.163302	231
Task * Position	1.22014e+06	4	305035	117686	0	0.919	0.167967	0.167966	231
Task * Symbol	70095.1	30	2336.5	901.448	0	0.394	0.00964946	0.00963875	231
Position * Symbol	1.42088e+06	120	11840.7	4568.25	0	0.93	0.195601	0.195558	231
Task * Position * Symbol	2.48405e+06	120	20700.4	7986.43	0	0.958	0.34196	0.341917	231
Residual	107669	41540	2.592						231
Source	SS	DF	MS	F	p-unc	np2	eta_sq	omega_sq	neuron_idx
Task	6939.78	1	6939.78	1093.83	8.69446e-237	0.026	0.000313428	0.000313141	232
Position	608154	4	152039	23963.9	0	0.698	0.0274666	0.0274655	232
Symbol	7.0825e+06	30	236083	37210.8	0	0.964	0.319874	0.319865	232
Task * Position	3.55064e+06	4	887661	139911	0	0.931	0.160361	0.16036	232
Task * Symbol	10676.7	30	355.891	56.095	0	0.039	0.000482203	0.000473607	232
Position * Symbol	1.77702e+06	120	14808.5	2334.08	0	0.871	0.0802573	0.0802229	232
Task * Position * Symbol	8.84207e+06	120	73683.9	11613.9	0	0.971	0.399343	0.399308	232
Residual	263550	41540	6.344						232
Source	SS	DF	MS	F	p-unc	np2	eta_sq	omega_sq	neuron_idx
Task	182678	1	182678	20227.9	0	0.327	0.00592739	0.00592709	233
Position	2.20171e+06	4	550426	60948.9	0	0.854	0.0714393	0.0714381	233
Symbol	1.21785e+07	30	405948	44950.8	0	0.97	0.395158	0.395149	233
Task * Position	3.81727e+06	4	954318	105672	0	0.911	0.12386	0.123859	233
Task * Symbol	415035	30	13834.5	1531.9	0	0.525	0.0134668	0.013458	233
Position * Symbol	4.88595e+06	120	40716.2	4508.52	0	0.929	0.158536	0.1585	233
Task * Position * Symbol	6.763e+06	120	56358.3	6240.58	0	0.947	0.219441	0.219406	233
Residual	375146	41540	9.031						233
Source	SS	DF	MS	F	p-unc	np2	eta_sq	omega_sq	neuron_idx
Task	3179.91	1	3179.91	286.554	4.59696e-64	0.007	0.000122341	0.000121914	234
Position	4.74808e+06	4	1.18702e+06	106967	0	0.912	0.182673	0.182671	234
Symbol	6.49649e+06	30	216550	19514.1	0	0.934	0.24994	0.249927	234
Task * Position	1.92752e+06	4	481880	43424.1	0	0.807	0.0741577	0.074156	234
Task * Symbol	31784.2	30	1059.47	95.473	0	0.065	0.00122283	0.00121003	234
Position * Symbol	8.18461e+06	120	68205.1	6146.23	0	0.947	0.314887	0.314836	234
Task * Position * Symbol	4.13956e+06	120	34496.3	3108.6	0	0.9	0.159262	0.15921	234
Residual	460972	41540	11.097						234
Source	SS	DF	MS	F	p-unc	np2	eta_sq	omega_sq	neuron_idx
Task	587950	1	587950	114502	0	0.734	0.0388928	0.0388925	235
Position	3.09162e+06	4	772905	150521	0	0.935	0.20451	0.204509	235
Symbol	1.24907e+06	30	41635.6	8108.42	0	0.854	0.0826256	0.0826154	235
Task * Position	8.0149e+06	4	2.00372e+06	390220	0	0.974	0.530185	0.530183	235
Task * Symbol	59562.3	30	1985.41	386.653	0	0.218	0.00394004	0.00392985	235
Position * Symbol	943522	120	7862.68	1531.24	0	0.816	0.0624139	0.0623731	235
Task * Position * Symbol	957263	120	7977.19	1553.54	0	0.818	0.0633228	0.063282	235
Residual	213302	41540	5.135						235
Source	SS	DF	MS	F	p-unc	np2	eta_sq	omega_sq	neuron_idx
Task	119868	1	119868	15492.8	0	0.272	0.005272	0.00527166	236
Position	1.51532e+06	4	378830	48963.4	0	0.825	0.0666466	0.0666452	236
Symbol	6.45544e+06	30	215181	27812	0	0.953	0.283922	0.283912	236
Task * Position	3.61351e+06	4	903378	116761	0	0.918	0.158929	0.158928	236
Task * Symbol	330567	30	11018.9	1424.18	0	0.507	0.0145389	0.0145287	236
Position * Symbol	3.14439e+06	120	26203.3	3386.75	0	0.907	0.138296	0.138255	236
Task * Position * Symbol	7.23616e+06	120	60301.3	7793.88	0	0.957	0.31826	0.318219	236
Residual	321395	41540	7.737						236
Source	SS	DF	MS	F	p-unc	np2	eta_sq	omega_sq	neuron_idx
Task	512390	1	512390	65065.3	0	0.61	0.0216569	0.0216566	237
Position	1.86344e+06	4	465861	59156.9	0	0.851	0.0787613	0.07876	237
Symbol	5.07941e+06	30	169314	21500.1	0	0.939	0.214689	0.214679	237
Task * Position	5.06611e+06	4	1.26653e+06	160829	0	0.939	0.214127	0.214126	237
Task * Symbol	459657	30	15321.9	1945.64	0	0.584	0.0194281	0.0194181	237
Position * Symbol	2.89609e+06	120	24134.1	3064.64	0	0.899	0.122408	0.122368	237
Task * Position * Symbol	7.45513e+06	120	62126.1	7889.02	0	0.958	0.315103	0.315063	237
Residual	327128	41540	7.875						237
Source	SS	DF	MS	F	p-unc	np2	eta_sq	omega_sq	neuron_idx
Task	37095.3	1	37095.3	3399.08	0	0.076	0.00122435	0.00122399	238
Position	1.22016e+06	4	305041	27951.2	0	0.729	0.0402721	0.0402706	238
Symbol	6.90403e+06	30	230134	21087.4	0	0.938	0.227871	0.22786	238
Task * Position	7.24619e+06	4	1.81155e+06	165994	0	0.941	0.239164	0.239163	238
Task * Symbol	34729.8	30	1157.66	106.078	0	0.071	0.00114628	0.00113547	238
Position * Symbol	3.78171e+06	120	31514.3	2887.68	0	0.893	0.124817	0.124774	238
Task * Position * Symbol	1.06207e+07	120	88505.9	8109.88	0	0.959	0.350542	0.350498	238
Residual	453340	41540	10.913						238
Source	SS	DF	MS	F	p-unc	np2	eta_sq	omega_sq	neuron_idx
Task	13760	1	13760	1585.02	0	0.037	0.000516669	0.000516343	239
Position	3.38977e+06	4	847442	97617.2	0	0.904	0.127281	0.12728	239
Symbol	7.42311e+06	30	247437	28502.3	0	0.954	0.278727	0.278718	239
Task * Position	3.72951e+06	4	932378	107401	0	0.912	0.140038	0.140037	239
Task * Symbol	24817.8	30	827.261	95.292	0	0.064	0.000931875	0.000922096	239
Position * Symbol	6.60318e+06	120	55026.5	6338.52	0	0.948	0.24794	0.247901	239
Task * Position * Symbol	5.08737e+06	120	42394.7	4883.46	0	0.934	0.191024	0.190985	239
Residual	360621	41540	8.681						239
Source	SS	DF	MS	F	p-unc	np2	eta_sq	omega_sq	neuron_idx
Task	5113.68	1	5113.68	1742.62	0	0.04	0.00101598	0.00101539	240
Position	102197	4	25549.3	8706.61	0	0.456	0.0203044	0.020302	240
Symbol	3.16858e+06	30	105619	35992.5	0	0.963	0.629527	0.629509	240
Task * Position	125963	4	31490.7	10731.3	0	0.508	0.0250261	0.0250237	240
Task * Symbol	74202.9	30	2473.43	842.886	0	0.378	0.0147425	0.014725	240
Position * Symbol	851684	120	7097.36	2418.61	0	0.875	0.169211	0.169141	240
Task * Position * Symbol	583628	120	4863.57	1657.39	0	0.827	0.115954	0.115884	240
Residual	121898	41540	2.934						240
Source	SS	DF	MS	F	p-unc	np2	eta_sq	omega_sq	neuron_idx
Task	78459.2	1	78459.2	9601.38	0	0.188	0.00314701	0.00314668	241
Position	935589	4	233897	28623	0	0.734	0.0375266	0.0375252	241
Symbol	7.35299e+06	30	245100	29993.9	0	0.956	0.294929	0.294919	241
Task * Position	4.88924e+06	4	1.22231e+06	149579	0	0.935	0.196108	0.196107	241
Task * Symbol	145799	30	4859.96	594.733	0	0.3	0.005848	0.00583817	241
Position * Symbol	2.01997e+06	120	16833	2059.93	0	0.856	0.081021	0.0809817	241
Task * Position * Symbol	9.16989e+06	120	76415.7	9351.31	0	0.964	0.367805	0.367766	241
Residual	339451	41540	8.172						241
Source	SS	DF	MS	F	p-unc	np2	eta_sq	omega_sq	neuron_idx
Task	1949.27	1	1949.27	470.158	1.11519e-103	0.011	0.000100823	0.000100609	242
Position	436200	4	109050	26302.5	0	0.717	0.0225617	0.0225609	242
Symbol	6.66723e+06	30	222241	53603.7	0	0.975	0.344852	0.344846	242
Task * Position	2.50046e+06	4	625114	150775	0	0.936	0.129332	0.129331	242
Task * Symbol	12945.7	30	431.523	104.082	0	0.07	0.000669595	0.000663162	242
Position * Symbol	1.49379e+06	120	12448.3	3002.48	0	0.897	0.0772641	0.0772383	242
Task * Position * Symbol	8.04879e+06	120	67073.3	16177.8	0	0.979	0.416311	0.416285	242
Residual	172225	41540	4.146						242
Source	SS	DF	MS	F	p-unc	np2	eta_sq	omega_sq	neuron_idx
Task	17549.9	1	17549.9	1419.78	1.52727e-305	0.033	0.000529742	0.000529369	243
Position	9.24373e+06	4	2.31093e+06	186953	0	0.947	0.279021	0.279019	243
Symbol	7.49091e+06	30	249697	20200.3	0	0.936	0.226112	0.226101	243
Task * Position	3.08378e+06	4	770944	62368.8	0	0.857	0.0930834	0.0930819	243
Task * Symbol	27742.8	30	924.759	74.812	0	0.051	0.000837412	0.000826218	243
Position * Symbol	7.87977e+06	120	65664.8	5312.23	0	0.939	0.23785	0.237805	243
Task * Position * Symbol	4.87223e+06	120	40601.9	3284.67	0	0.905	0.147068	0.147023	243
Residual	513478	41540	12.361						243
Source	SS	DF	MS	F	p-unc	np2	eta_sq	omega_sq	neuron_idx
Task	9867.22	1	9867.22	978.046	3.1126e-212	0.023	0.000384255	0.000383862	244
Position	791759	4	197940	19619.9	0	0.654	0.0308331	0.0308315	244
Symbol	6.90914e+06	30	230305	22828	0	0.943	0.269059	0.269048	244
Task * Position	4.95057e+06	4	1.23764e+06	122676	0	0.922	0.192788	0.192786	244
Task * Symbol	22675.5	30	755.851	74.92	0	0.051	0.000883043	0.000871256	244
Position * Symbol	2.88618e+06	120	24051.5	2384	0	0.873	0.112395	0.112348	244
Task * Position * Symbol	9.68957e+06	120	80746.5	8003.65	0	0.959	0.377337	0.37729	244
Residual	419085	41540	10.089						244
Source	SS	DF	MS	F	p-unc	np2	eta_sq	omega_sq	neuron_idx
Task	411269	1	411269	41619.7	0	0.5	0.0135687	0.0135684	245
Position	1.12068e+06	4	280169	28352.6	0	0.732	0.0369736	0.0369723	245
Symbol	9.42831e+06	30	314277	31804.3	0	0.958	0.311061	0.311051	245
Task * Position	6.05233e+06	4	1.51308e+06	153121	0	0.936	0.19968	0.199679	245
Task * Symbol	416455	30	13881.8	1404.82	0	0.504	0.0137398	0.01373	245
Position * Symbol	4.47275e+06	120	37273	3771.96	0	0.916	0.147566	0.147527	245
Task * Position * Symbol	7.99788e+06	120	66649	6744.76	0	0.951	0.263868	0.263829	245
Residual	410481	41540	9.882						245
Source	SS	DF	MS	F	p-unc	np2	eta_sq	omega_sq	neuron_idx
Task	16563	1	16563	2208.16	0	0.05	0.000546708	0.000546461	247
Position	1.12507e+06	4	281267	37498	0	0.783	0.0371359	0.0371349	247
Symbol	8.83904e+06	30	294635	39280.2	0	0.966	0.291756	0.291749	247
Task * Position	6.86336e+06	4	1.71584e+06	228753	0	0.957	0.226544	0.226543	247
Task * Symbol	32563.6	30	1085.45	144.711	0	0.095	0.00107485	0.00106742	247
Position * Symbol	2.17437e+06	120	18119.7	2415.69	0	0.875	0.0717709	0.0717412	247
Task * Position * Symbol	1.09334e+07	120	91111.7	12146.9	0	0.972	0.360887	0.360857	247
Residual	311585	41540	7.501						247
Source	SS	DF	MS	F	p-unc	np2	eta_sq	omega_sq	neuron_idx
Task	20464.5	1	20464.5	4042.64	0	0.089	0.00101565	0.0010154	248
Position	2.99467e+06	4	748667	147895	0	0.934	0.148625	0.148624	248
Symbol	2.39805e+06	30	79934.9	15790.6	0	0.919	0.119015	0.119007	248
Task * Position	5.06341e+06	4	1.26585e+06	250061	0	0.96	0.251297	0.251296	248
Task * Symbol	16457	30	548.568	108.366	0	0.073	0.000816763	0.000809226	248
Position * Symbol	3.54823e+06	120	29568.6	5841.09	0	0.944	0.176098	0.176068	248
Task * Position * Symbol	5.89756e+06	120	49146.3	9708.55	0	0.966	0.292696	0.292666	248
Residual	210283	41540	5.062						248
Source	SS	DF	MS	F	p-unc	np2	eta_sq	omega_sq	neuron_idx
Task	3610.94	1	3610.94	529.312	2.13594e-116	0.013	0.000147426	0.000147148	249
Position	2.94581e+06	4	736452	107953	0	0.912	0.12027	0.120269	249
Symbol	7.6051e+06	30	253503	37159.9	0	0.964	0.310498	0.31049	249
Task * Position	2.12182e+06	4	530455	77757	0	0.882	0.0866289	0.0866278	249
Task * Symbol	11129	30	370.966	54.378	0	0.038	0.00045437	0.000446014	249
Position * Symbol	6.85791e+06	120	57149.3	8377.26	0	0.96	0.279992	0.279959	249
Task * Position * Symbol	4.66444e+06	120	38870.4	5697.83	0	0.943	0.190438	0.190405	249
Residual	283384	41540	6.822						249
Source	SS	DF	MS	F	p-unc	np2	eta_sq	omega_sq	neuron_idx
Task	272985	1	272985	63757.4	0	0.605	0.0220666	0.0220663	250
Position	1.60761e+06	4	401901	93866.7	0	0.9	0.12995	0.129949	250
Symbol	3.06511e+06	30	102170	23862.6	0	0.945	0.247767	0.247757	250
Task * Position	2.60702e+06	4	651755	152222	0	0.936	0.210738	0.210736	250
Task * Symbol	135646	30	4521.54	1056.04	0	0.433	0.0109649	0.0109545	250
Position * Symbol	1.56945e+06	120	13078.7	3054.62	0	0.898	0.126866	0.126824	250
Task * Position * Symbol	2.93526e+06	120	24460.5	5712.91	0	0.943	0.237271	0.237229	250
Residual	177858	41540	4.282						250
Source	SS	DF	MS	F	p-unc	np2	eta_sq	omega_sq	neuron_idx
Task	361135	1	361135	72495.9	0	0.636	0.0310782	0.0310778	251
Position	2.41159e+06	4	602898	121029	0	0.921	0.207534	0.207533	251
Symbol	729617	30	24320.6	4882.22	0	0.779	0.0627887	0.0627758	251
Task * Position	5.51814e+06	4	1.37953e+06	276934	0	0.964	0.474874	0.474872	251
Task * Symbol	44832.6	30	1494.42	299.996	0	0.178	0.00385816	0.00384529	251
Position * Symbol	1.11019e+06	120	9251.55	1857.2	0	0.843	0.0955393	0.0954878	251
Task * Position * Symbol	1.23777e+06	120	10314.8	2070.64	0	0.857	0.106519	0.106468	251
Residual	206930	41540	4.981						251
Source	SS	DF	MS	F	p-unc	np2	eta_sq	omega_sq	neuron_idx
Task	269593	1	269593	74474.2	0	0.642	0.0186176	0.0186173	252
Position	2.59064e+06	4	647660	178914	0	0.945	0.178905	0.178903	252
Symbol	2.29155e+06	30	76384.8	21101.1	0	0.938	0.15825	0.158242	252
Task * Position	6.08054e+06	4	1.52013e+06	419932	0	0.976	0.41991	0.419909	252
Task * Symbol	71492.3	30	2383.08	658.317	0	0.322	0.00493712	0.00492962	252
Position * Symbol	1.27614e+06	120	10634.5	2937.75	0	0.895	0.088128	0.088098	252
Task * Position * Symbol	1.75025e+06	120	14585.4	4029.17	0	0.921	0.120869	0.120839	252
Residual	150373	41540	3.62						252
Source	SS	DF	MS	F	p-unc	np2	eta_sq	omega_sq	neuron_idx
Task	1.56569e+06	1	1.56569e+06	169931	0	0.804	0.0376857	0.0376855	253
Position	1.0535e+07	4	2.63375e+06	285851	0	0.965	0.253574	0.253573	253
Symbol	180055	30	6001.84	651.403	0	0.32	0.00433387	0.00432721	253
Task * Position	2.8189e+07	4	7.04725e+06	764866	0	0.987	0.6785	0.678499	253
Task * Symbol	43680	30	1456	158.026	0	0.102	0.00105136	0.00104471	253
Position * Symbol	328354	120	2736.28	296.98	0	0.462	0.00790337	0.00787676	253
Task * Position * Symbol	321520	120	2679.33	290.799	0	0.457	0.00773888	0.00771227	253
Residual	382737	41540	9.214						253
Source	SS	DF	MS	F	p-unc	np2	eta_sq	omega_sq	neuron_idx
Task	79.149	1	79.149	8.256	0.00406316	0	4.39092e-06	3.85906e-06	254
Position	1.46819e+06	4	367048	38287.8	0	0.787	0.0814503	0.0814481	254
Symbol	3.9925e+06	30	133083	13882.3	0	0.909	0.22149	0.221474	254
Task * Position	3.2984e+06	4	824600	86016.3	0	0.892	0.182984	0.182982	254
Task * Symbol	20328.5	30	677.617	70.684	0	0.049	0.00112776	0.0011118	254
Position * Symbol	3.79345e+06	120	31612.1	3297.54	0	0.905	0.210447	0.210384	254
Task * Position * Symbol	5.05446e+06	120	42120.5	4393.71	0	0.927	0.280404	0.28034	254
Residual	398225	41540	9.587						254
Source	SS	DF	MS	F	p-unc	np2	eta_sq	omega_sq	neuron_idx
Task	409321	1	409321	63190.8	0	0.603	0.0211527	0.0211524	255
Position	1.30606e+06	4	326515	50407.2	0	0.829	0.0674939	0.0674925	255
Symbol	4.57371e+06	30	152457	23536.2	0	0.944	0.236358	0.236348	255
Task * Position	3.4441e+06	4	861024	132924	0	0.928	0.177982	0.177981	255
Task * Symbol	429130	30	14304.3	2208.3	0	0.615	0.0221764	0.0221663	255
Position * Symbol	2.41916e+06	120	20159.7	3112.24	0	0.9	0.125016	0.124976	255
Task * Position * Symbol	6.50023e+06	120	54168.6	8362.52	0	0.96	0.335916	0.335875	255
Residual	269077	41540	6.478						255
Source	SS	DF	MS	F	p-unc	np2	eta_sq	omega_sq	neuron_idx
Task	6082.73	1	6082.73	485.677	5.11487e-107	0.012	0.000198159	0.000197751	256
Position	6.46217e+06	4	1.61554e+06	128993	0	0.925	0.21052	0.210518	256
Symbol	7.55748e+06	30	251916	20114.3	0	0.936	0.246203	0.24619	256
Task * Position	3.02879e+06	4	757198	60458.7	0	0.853	0.09867	0.0986684	256
Task * Symbol	15091.8	30	503.061	40.167	7.5167e-231	0.028	0.000491652	0.000479412	256
Position * Symbol	8.32011e+06	120	69334.2	5536.01	0	0.941	0.271047	0.270998	256
Task * Position * Symbol	4.78621e+06	120	39885	3184.63	0	0.902	0.155922	0.155873	256
Residual	520256	41540	12.524						256
Source	SS	DF	MS	F	p-unc	np2	eta_sq	omega_sq	neuron_idx
Task	21785.9	1	21785.9	4144.59	0	0.091	0.001104	0.00110374	257
Position	3.28279e+06	4	820696	156131	0	0.938	0.166356	0.166355	257
Symbol	2.27206e+06	30	75735.4	14408.1	0	0.912	0.115137	0.115129	257
Task * Position	5.77193e+06	4	1.44298e+06	274516	0	0.964	0.292494	0.292493	257
Task * Symbol	29961.9	30	998.73	190.001	0	0.121	0.00151833	0.00151034	257
Position * Symbol	2.96835e+06	120	24736.2	4705.88	0	0.931	0.150422	0.15039	257
Task * Position * Symbol	5.16826e+06	120	43068.9	8193.52	0	0.959	0.261903	0.261871	257
Residual	218353	41540	5.256						257
Source	SS	DF	MS	F	p-unc	np2	eta_sq	omega_sq	neuron_idx
Task	478334	1	478334	48847.9	0	0.54	0.012737	0.0127368	258
Position	1.90925e+07	4	4.77313e+06	487437	0	0.979	0.508394	0.508393	258
Symbol	3.5315e+06	30	117717	12021.4	0	0.897	0.0940366	0.0940288	258
Task * Position	4.80432e+06	4	1.20108e+06	122655	0	0.922	0.127929	0.127928	258
Task * Symbol	296662	30	9888.74	1009.85	0	0.422	0.0078995	0.00789167	258
Position * Symbol	6.4865e+06	120	54054.1	5520.06	0	0.941	0.172722	0.172691	258
Task * Position * Symbol	2.45796e+06	120	20483	2091.74	0	0.858	0.0654504	0.0654191	258
Residual	406773	41540	9.792						258
Source	SS	DF	MS	F	p-unc	np2	eta_sq	omega_sq	neuron_idx
Task	1.603	1	1.603	0.161	0.6885	0	7.21387e-08	-3.76669e-07	259
Position	1.6828e+06	4	420700	42182.1	0	0.802	0.0757299	0.0757281	259
Symbol	6.73684e+06	30	224561	22515.9	0	0.942	0.303173	0.30316	259
Task * Position	1.32857e+06	4	332142	33302.7	0	0.762	0.0597887	0.0597868	259
Task * Symbol	29838.9	30	994.63	99.728	0	0.067	0.00134282	0.00132935	259
Position * Symbol	6.4988e+06	120	54156.7	5430.09	0	0.94	0.292461	0.292407	259
Task * Position * Symbol	5.52994e+06	120	46082.8	4620.55	0	0.93	0.24886	0.248806	259
Residual	414297	41540	9.973						259
Source	SS	DF	MS	F	p-unc	np2	eta_sq	omega_sq	neuron_idx
Task	10637.2	1	10637.2	2473.21	0	0.056	0.000584457	0.000584221	260
Position	2.4358e+06	4	608949	141584	0	0.932	0.133834	0.133833	260
Symbol	2.40672e+06	30	80224.1	18652.5	0	0.931	0.132236	0.132229	260
Task * Position	4.2219e+06	4	1.05548e+06	245404	0	0.959	0.231971	0.23197	260
Task * Symbol	15437.1	30	514.571	119.64	0	0.08	0.000848185	0.000841096	260
Position * Symbol	3.28541e+06	120	27378.4	6365.64	0	0.948	0.180515	0.180487	260
Task * Position * Symbol	5.6456e+06	120	47046.7	10938.6	0	0.969	0.310195	0.310167	260
Residual	178663	41540	4.301						260
Source	SS	DF	MS	F	p-unc	np2	eta_sq	omega_sq	neuron_idx
Task	328743	1	328743	67231.6	0	0.618	0.019284	0.0192837	261
Position	2.8493e+06	4	712325	145679	0	0.933	0.167139	0.167138	261
Symbol	2.3505e+06	30	78350	16023.5	0	0.92	0.13788	0.137871	261
Task * Position	4.64263e+06	4	1.16066e+06	237368	0	0.958	0.272336	0.272334	261
Task * Symbol	246820	30	8227.33	1682.58	0	0.549	0.0144784	0.0144698	261
Position * Symbol	2.21767e+06	120	18480.6	3779.5	0	0.916	0.130088	0.130054	261
Task * Position * Symbol	4.20866e+06	120	35072.2	7172.66	0	0.954	0.246879	0.246845	261
Residual	203118	41540	4.89						261
Source	SS	DF	MS	F	p-unc	np2	eta_sq	omega_sq	neuron_idx
Task	9526.43	1	9526.43	1016.87	1.78949e-220	0.024	0.000584822	0.000584246	262
[truncated: 511 more rows]
